# Supplementary material for: Exhaustive identification of genome-wide binding events of transcriptional regulators with ICEBERG
Source: Research Square preprint supplement (doi:10.21203/rs.3.rs-3124696/v1), 2023-07-26
Supplement: Supplementary file 1 [file SupplementaryData.xlsx]

## Sheet: ICEBERG_Peaks_Bcat
Chr	Start	End	Probability Group
chr1	199973	200279	USR
chr1	778453	778862	USR
chr1	940381	940966	USR
chr1	941759	942219	USR
chr1	976159	976520	USR
chr1	1019664	1019947	USR
chr1	1073929	1074249	USR
chr1	1308035	1308462	USR
chr1	1318301	1318610	USR
chr1	1504756	1505582	USR
chr1	1686550	1686932	USR
chr1	1959733	1960212	USR
chr1	2189392	2189660	USR
chr1	2526333	2526587	USR
chr1	3293112	3293673	USR
chr1	3319863	3320885	USR
chr1	6157630	6158218	USR
chr1	6199560	6200024	USR
chr1	6205066	6206285	USR
chr1	6220208	6220474	USR
chr1	6242018	6242789	USR
chr1	6393180	6394010	USR
chr1	6419777	6420250	USR
chr1	6447455	6447869	USR
chr1	6960429	6960953	USR
chr1	7117386	7118041	USR
chr1	7299094	7300339	USR
chr1	7312603	7313443	USR
chr1	7913066	7913424	USR
chr1	8040274	8041106	USR
chr1	8044194	8044755	USR
chr1	8045685	8046909	USR
chr1	8047941	8048356	USR
chr1	8055945	8056487	USR
chr1	8075642	8076322	USR
chr1	8082391	8083960	USR
chr1	8089273	8089666	USR
chr1	8154453	8155711	USR
chr1	8166967	8167446	USR
chr1	8189758	8190367	USR
chr1	8259084	8259818	USR
chr1	8448997	8449507	USR
chr1	8493936	8494329	USR
chr1	8525769	8526032	USR
chr1	8817929	8818406	USR
chr1	8873644	8874237	USR
chr1	8899599	8900376	USR
chr1	9080543	9081075	USR
chr1	9129536	9130089	USR
chr1	9145377	9146029	USR
chr1	9181528	9181893	USR
chr1	9588498	9588804	USR
chr1	9825346	9825767	USR
chr1	9942704	9943321	USR
chr1	10032810	10033271	USR
chr1	10209957	10210367	USR
chr1	10211672	10211955	USR
chr1	10528160	10528438	USR
chr1	10793321	10793763	USR
chr1	11012411	11012863	USR
chr1	11690651	11691166	USR
chr1	11693166	11693546	USR
chr1	11805571	11806373	USR
chr1	11821510	11821872	USR
chr1	12018983	12019901	USR
chr1	12161673	12162463	USR
chr1	12177992	12178625	USR
chr1	12469606	12470405	USR
chr1	12480977	12481402	USR
chr1	12604204	12604605	USR
chr1	12616121	12616772	USR
chr1	12617338	12617577	USR
chr1	12618123	12619110	USR
chr1	12619572	12620044	USR
chr1	13759271	13759698	USR
chr1	14996028	14996906	USR
chr1	15260375	15261622	USR
chr1	15526066	15527043	USR
chr1	15788098	15788394	USR
chr1	15796601	15796940	USR
chr1	15798996	15799309	USR
chr1	15849169	15849822	USR
chr1	15985572	15986204	USR
chr1	16012824	16013356	USR
chr1	16145075	16146173	USR
chr1	16159011	16159801	USR
chr1	16161982	16162888	USR
chr1	16175644	16176304	USR
chr1	16181762	16182124	USR
chr1	16514361	16514949	USR
chr1	16534800	16535229	USR
chr1	16665772	16666645	USR
chr1	16739954	16741819	USR
chr1	16861372	16862327	USR
chr1	16862970	16863395	USR
chr1	17128377	17128752	USR
chr1	17251667	17252118	USR
chr1	17292298	17292668	USR
chr1	17519954	17520396	USR
chr1	17569358	17570015	USR
chr1	18618498	18619173	USR
chr1	18643477	18644025	USR
chr1	18926563	18926999	USR
chr1	19450793	19451401	USR
chr1	19659727	19660225	USR
chr1	19903529	19904083	USR
chr1	20480963	20481396	USR
chr1	20612194	20612602	USR
chr1	20634069	20635029	USR
chr1	20661503	20661791	USR
chr1	20848039	20848386	USR
chr1	21294457	21295179	USR
chr1	21574179	21575085	USR
chr1	22039783	22040131	USR
chr1	22428852	22429233	USR
chr1	22832012	22832502	USR
chr1	23196734	23197350	USR
chr1	23344424	23345106	USR
chr1	23368158	23369374	USR
chr1	23403690	23404250	USR
chr1	23484340	23484709	USR
chr1	23539771	23540259	USR
chr1	23562230	23562739	USR
chr1	23577288	23577671	USR
chr1	23619645	23620064	USR
chr1	23865364	23865825	USR
chr1	23959207	23960017	USR
chr1	23980707	23981155	USR
chr1	24046091	24046352	USR
chr1	24150280	24150868	USR
chr1	24187416	24187834	USR
chr1	24199410	24199730	USR
chr1	24266489	24266801	USR
chr1	24536206	24536745	USR
chr1	24540940	24541619	USR
chr1	24555449	24555903	USR
chr1	24559153	24559632	USR
chr1	24642851	24643242	USR
chr1	25022528	25023316	USR
chr1	25430323	25431163	USR
chr1	25875280	25875993	USR
chr1	25892359	25893124	USR
chr1	25998021	25998425	USR
chr1	26035097	26035792	USR
chr1	26275770	26276029	USR
chr1	26620484	26621869	USR
chr1	26692341	26693396	USR
chr1	26990661	26991097	USR
chr1	27045845	27046316	USR
chr1	27341674	27342173	USR
chr1	27391547	27392623	USR
chr1	27542399	27542874	USR
chr1	27959461	27959913	USR
chr1	28369617	28370109	USR
chr1	28526786	28527132	USR
chr1	28648078	28649174	USR
chr1	28736358	28737139	USR
chr1	30618063	30618653	USR
chr1	30797466	30798705	USR
chr1	31170972	31171224	USR
chr1	31644935	31645170	USR
chr1	31689711	31690285	USR
chr1	31939077	31940263	USR
chr1	31944542	31944956	USR
chr1	32107587	32108239	USR
chr1	32394222	32395124	USR
chr1	32725088	32725531	USR
chr1	32759702	32760324	USR
chr1	32761413	32761676	USR
chr1	32964641	32965319	USR
chr1	32989047	32989722	USR
chr1	33099464	33099825	USR
chr1	33127243	33127603	USR
chr1	33219819	33220137	USR
chr1	33430975	33431606	USR
chr1	33436670	33437335	USR
chr1	33458441	33459114	USR
chr1	34763086	34763963	USR
chr1	35193157	35193625	USR
chr1	35268398	35268711	USR
chr1	35557265	35557649	USR
chr1	35642131	35642630	USR
chr1	36401192	36401614	USR
chr1	36437031	36437275	USR
chr1	37514570	37514955	USR
chr1	37534688	37534957	USR
chr1	37859719	37860228	USR
chr1	38958925	38959838	USR
chr1	39102472	39102956	USR
chr1	39105485	39106051	USR
chr1	39196546	39196924	USR
chr1	39394459	39395518	USR
chr1	39701850	39702278	USR
chr1	40040122	40040947	USR
chr1	40315940	40316696	USR
chr1	40691682	40691982	USR
chr1	40862346	40862811	USR
chr1	40875609	40876173	USR
chr1	40979597	40979978	USR
chr1	41123373	41123596	USR
chr1	41342095	41342495	USR
chr1	41432675	41433225	USR
chr1	41495504	41496650	USR
chr1	41504052	41504725	USR
chr1	41850051	41850569	USR
chr1	41869944	41870611	USR
chr1	41945724	41946237	USR
chr1	42462790	42463218	USR
chr1	42658082	42658686	USR
chr1	42681945	42682410	USR
chr1	42816680	42817711	USR
chr1	42940919	42941439	USR
chr1	43143543	43143809	USR
chr1	43368108	43368518	USR
chr1	43550088	43550615	USR
chr1	43783553	43784154	USR
chr1	43858282	43858603	USR
chr1	43929222	43930889	USR
chr1	44526667	44526992	USR
chr1	44689241	44689673	USR
chr1	44713182	44713570	USR
chr1	44721370	44722230	USR
chr1	44793753	44794330	USR
chr1	44819552	44820151	USR
chr1	44968335	44968594	USR
chr1	45011121	45011784	USR
chr1	45491241	45491524	USR
chr1	45750544	45751016	USR
chr1	45802928	45803393	USR
chr1	45929128	45929789	USR
chr1	45978786	45979565	USR
chr1	46132716	46133057	USR
chr1	46303387	46303612	USR
chr1	46339523	46339935	USR
chr1	46340461	46341038	USR
chr1	46517018	46517398	USR
chr1	46686971	46687480	USR
chr1	47314186	47314850	USR
chr1	47334052	47334768	USR
chr1	47437418	47437946	USR
chr1	50960450	50960734	USR
chr1	50968307	50968560	USR
chr1	51517706	51518202	USR
chr1	51541278	51541740	USR
chr1	51878772	51879225	USR
chr1	51941700	51942152	USR
chr1	52056008	52056522	USR
chr1	52157968	52158857	USR
chr1	52243043	52243531	USR
chr1	52404076	52404817	USR
chr1	52574528	52575094	USR
chr1	53431614	53432067	USR
chr1	53685188	53685759	USR
chr1	53837151	53837544	USR
chr1	53956934	53957747	USR
chr1	54053204	54053571	USR
chr1	54407231	54407636	USR
chr1	54488270	54488903	USR
chr1	54564221	54564650	USR
chr1	54764610	54764989	USR
chr1	56494218	56494607	USR
chr1	56579494	56579723	USR
chr1	58784044	58784618	USR
chr1	58814807	58816708	USR
chr1	58848630	58849310	USR
chr1	58885096	58885759	USR
chr1	59730483	59731710	USR
chr1	61050097	61050373	USR
chr1	61077011	61077309	USR
chr1	61337805	61338568	USR
chr1	61782643	61783123	USR
chr1	61839659	61840158	USR
chr1	63714021	63714592	USR
chr1	63731691	63732229	USR
chr1	63980755	63981086	USR
chr1	64917326	64917781	USR
chr1	65066786	65067331	USR
chr1	65075333	65075815	USR
chr1	65420016	65420933	USR
chr1	65493985	65494251	USR
chr1	65513034	65513766	USR
chr1	65522526	65523046	USR
chr1	65958743	65959274	USR
chr1	66242801	66243055	USR
chr1	66261999	66262924	USR
chr1	66271013	66272105	USR
chr1	66274406	66274963	USR
chr1	66282316	66282891	USR
chr1	66315497	66316313	USR
chr1	66330841	66331470	USR
chr1	66331774	66332312	USR
chr1	66436323	66436997	USR
chr1	67684360	67685237	USR
chr1	67748614	67749117	USR
chr1	68061855	68062291	USR
chr1	68207005	68207258	USR
chr1	68232437	68232979	USR
chr1	68459756	68460587	USR
chr1	70354489	70355079	USR
chr1	70420278	70420612	USR
chr1	77536719	77537063	USR
chr1	78003939	78005129	USR
chr1	79193159	79193837	USR
chr1	80531066	80531873	USR
chr1	82565212	82565983	USR
chr1	83998942	83999691	USR
chr1	84089787	84090034	USR
chr1	84147850	84148245	USR
chr1	84168576	84168846	USR
chr1	84302822	84303680	USR
chr1	84349727	84351207	USR
chr1	84353581	84354148	USR
chr1	84387163	84387566	USR
chr1	84427264	84428906	USR
chr1	84479311	84479677	USR
chr1	84505978	84506859	USR
chr1	84620725	84621123	USR
chr1	84945931	84946407	USR
chr1	85200225	85201399	USR
chr1	85339005	85339625	USR
chr1	85576538	85576997	USR
chr1	85607128	85607522	USR
chr1	87328004	87328970	USR
chr1	87795493	87796078	USR
chr1	87806021	87806390	USR
chr1	88684344	88685012	USR
chr1	89261924	89262848	USR
chr1	89994594	89995341	USR
chr1	90403293	90403809	USR
chr1	90721468	90721932	USR
chr1	91404256	91404803	USR
chr1	91804659	91805103	USR
chr1	91890947	91891533	USR
chr1	92298726	92299003	USR
chr1	92485777	92486268	USR
chr1	92804736	92805091	USR
chr1	92951145	92951549	USR
chr1	93442323	93442750	USR
chr1	93447063	93448041	USR
chr1	93448284	93448570	USR
chr1	93843991	93844613	USR
chr1	94160767	94161401	USR
chr1	94196749	94197318	USR
chr1	94285240	94286047	USR
chr1	94317182	94317916	USR
chr1	94327311	94327720	USR
chr1	94417910	94418591	USR
chr1	94541683	94542188	USR
chr1	94801958	94802360	USR
chr1	97921034	97921470	USR
chr1	99773756	99774231	USR
chr1	99969855	99970236	USR
chr1	100132746	100133547	USR
chr1	100894629	100895163	USR
chr1	101288651	101288999	USR
chr1	108865447	108865938	USR
chr1	109274741	109275356	USR
chr1	109483927	109484222	USR
chr1	110029428	110029709	USR
chr1	110336195	110337382	USR
chr1	110433776	110434085	USR
chr1	110927753	110928025	USR
chr1	111592654	111593328	USR
chr1	111755402	111755890	USR
chr1	112396150	112396591	USR
chr1	112715761	112716268	USR
chr1	112956795	112957892	USR
chr1	113199517	113200184	USR
chr1	113389880	113390441	USR
chr1	113759199	113759589	USR
chr1	113804836	113805210	USR
chr1	113929129	113930124	USR
chr1	114473222	114474188	USR
chr1	114510600	114511648	USR
chr1	114671366	114671825	USR
chr1	115179634	115179932	USR
chr1	115668568	115669562	USR
chr1	115671103	115671904	USR
chr1	115748441	115748800	USR
chr1	116134328	116134782	USR
chr1	116556469	116556839	USR
chr1	116570634	116571239	USR
chr1	117059843	117060236	USR
chr1	117612737	117613204	USR
chr1	119279280	119279901	USR
chr1	119648418	119648722	USR
chr1	120340473	120340934	USR
chr1	120850304	120850827	USR
chr1	120913947	120914506	USR
chr1	121184442	121185243	USR
chr1	121269652	121270223	USR
chr1	121307682	121308072	USR
chr1	121332921	121333350	USR
chr1	121860353	121860704	USR
chr1	123500859	123501107	USR
chr1	124462529	124462833	USR
chr1	144077209	144077762	USR
chr1	144560337	144560734	USR
chr1	144946565	144946994	USR
chr1	144972024	144972295	USR
chr1	145009825	145010540	USR
chr1	145093616	145094104	USR
chr1	145215097	145215584	USR
chr1	145280388	145280789	USR
chr1	145464578	145465997	USR
chr1	145782386	145782883	USR
chr1	145823768	145824421	USR
chr1	145891857	145892518	USR
chr1	145918745	145918980	USR
chr1	145927223	145927624	USR
chr1	145985742	145986161	USR
chr1	146035276	146036143	USR
chr1	146051779	146052730	USR
chr1	146369756	146370351	USR
chr1	146376946	146377621	USR
chr1	146386883	146387750	USR
chr1	146938374	146938667	USR
chr1	147172274	147172883	USR
chr1	147242749	147243186	USR
chr1	147544980	147545851	USR
chr1	147599773	147600064	USR
chr1	147670592	147670988	USR
chr1	148037991	148039125	USR
chr1	148264550	148265229	USR
chr1	148458135	148458511	USR
chr1	148522771	148523108	USR
chr1	148528767	148529238	USR
chr1	148748756	148749437	USR
chr1	149851966	149852432	USR
chr1	149885486	149886239	USR
chr1	149936943	149937429	USR
chr1	150066512	150067632	USR
chr1	150561139	150561999	USR
chr1	150976898	150977692	USR
chr1	151070746	151071313	USR
chr1	151198036	151198720	USR
chr1	151513040	151513499	USR
chr1	151680559	151681291	USR
chr1	151909269	151909934	USR
chr1	151945516	151946461	USR
chr1	151988404	151988940	USR
chr1	151990706	151991671	USR
chr1	152034801	152035247	USR
chr1	152036020	152036927	USR
chr1	152167802	152168365	USR
chr1	153538260	153538967	USR
chr1	153565950	153566577	USR
chr1	153572411	153572848	USR
chr1	153609073	153609578	USR
chr1	153708634	153709043	USR
chr1	153775829	153776262	USR
chr1	153922759	153923191	USR
chr1	153958543	153959071	USR
chr1	153967486	153967712	USR
chr1	154183318	154183709	USR
chr1	154324805	154325212	USR
chr1	154932156	154932708	USR
chr1	155017375	155017652	USR
chr1	155063729	155063990	USR
chr1	155167587	155167960	USR
chr1	155193142	155193498	USR
chr1	155226778	155227912	USR
chr1	155272765	155273846	USR
chr1	155276967	155277306	USR
chr1	155609638	155610123	USR
chr1	155745409	155745826	USR
chr1	156053923	156054746	USR
chr1	156103274	156104254	USR
chr1	156114280	156114640	USR
chr1	156123178	156123821	USR
chr1	156126204	156126590	USR
chr1	156193626	156194274	USR
chr1	156338443	156339034	USR
chr1	156456869	156457826	USR
chr1	156501168	156501695	USR
chr1	156503264	156503768	USR
chr1	156686044	156686718	USR
chr1	156689187	156689636	USR
chr1	156708293	156708930	USR
chr1	156709546	156710382	USR
chr1	156712631	156713878	USR
chr1	156741231	156741696	USR
chr1	156767027	156767865	USR
chr1	156896430	156897049	USR
chr1	157046416	157046826	USR
chr1	157138510	157139210	USR
chr1	159869032	159869600	USR
chr1	159881769	159882427	USR
chr1	159900270	159900914	USR
chr1	159925109	159925878	USR
chr1	159945613	159946214	USR
chr1	160032057	160032629	USR
chr1	160261464	160261858	USR
chr1	161021011	161021442	USR
chr1	161083229	161083731	USR
chr1	161153666	161153942	USR
chr1	161417422	161417948	USR
chr1	161421691	161422205	USR
chr1	161530530	161531184	USR
chr1	161539855	161540565	USR
chr1	161749790	161750214	USR
chr1	162023760	162024615	USR
chr1	162069378	162069935	USR
chr1	162075374	162075625	USR
chr1	162075861	162076321	USR
chr1	162144639	162145699	USR
chr1	162147644	162148009	USR
chr1	162538793	162539367	USR
chr1	162605428	162606026	USR
chr1	162790508	162791095	USR
chr1	162856024	162856741	USR
chr1	163035550	163036378	USR
chr1	164637676	164638176	USR
chr1	164659950	164660457	USR
chr1	164683160	164683731	USR
chr1	165597782	165598287	USR
chr1	165630899	165631368	USR
chr1	165631765	165632207	USR
chr1	166839796	166840419	USR
chr1	166875796	166876489	USR
chr1	167220332	167220764	USR
chr1	167715698	167716159	USR
chr1	167716400	167716731	USR
chr1	168079640	168080380	USR
chr1	168178499	168179259	USR
chr1	168320931	168321414	USR
chr1	169113837	169114195	USR
chr1	169529243	169529900	USR
chr1	169781138	169781562	USR
chr1	169794750	169795334	USR
chr1	169890998	169891708	USR
chr1	169893758	169894505	USR
chr1	171251204	171251472	USR
chr1	171781091	171781665	USR
chr1	172845334	172845591	USR
chr1	172894499	172896469	USR
chr1	172918138	172918487	USR
chr1	172933765	172934358	USR
chr1	173190438	173191024	USR
chr1	173824508	173824876	USR
chr1	173868238	173868578	USR
chr1	174023531	174023814	USR
chr1	174159406	174159870	USR
chr1	174238844	174239096	USR
chr1	175192637	175193590	USR
chr1	175197663	175198028	USR
chr1	175419989	175420738	USR
chr1	175421060	175422010	USR
chr1	176207237	176207772	USR
chr1	178536970	178537637	USR
chr1	178684513	178685111	USR
chr1	178724606	178725047	USR
chr1	178726222	178726680	USR
chr1	178880988	178881645	USR
chr1	179128888	179129676	USR
chr1	179814682	179814994	USR
chr1	180505690	180506143	USR
chr1	181117484	181118289	USR
chr1	181310427	181310807	USR
chr1	182186053	182186616	USR
chr1	182290118	182290400	USR
chr1	182391469	182392160	USR
chr1	183023730	183023975	USR
chr1	183032733	183033654	USR
chr1	183060319	183060901	USR
chr1	183088803	183089333	USR
chr1	183470013	183470602	USR
chr1	183471800	183472332	USR
chr1	183493619	183494053	USR
chr1	184024923	184025542	USR
chr1	186152420	186152998	USR
chr1	188782161	188782589	USR
chr1	189619665	189620086	USR
chr1	190478372	190479184	USR
chr1	190679263	190679769	USR
chr1	192539450	192540169	USR
chr1	192559191	192559776	USR
chr1	192639908	192640265	USR
chr1	192700519	192701768	USR
chr1	192701991	192702976	USR
chr1	193104760	193105541	USR
chr1	193558311	193558679	USR
chr1	193700956	193701626	USR
chr1	197146588	197147078	USR
chr1	197775558	197775866	USR
chr1	197915736	197916176	USR
chr1	198158957	198159448	USR
chr1	198932554	198932954	USR
chr1	198935298	198936061	USR
chr1	199684941	199685531	USR
chr1	199734250	199734688	USR
chr1	199855552	199855997	USR
chr1	200150421	200151198	USR
chr1	200410156	200410564	USR
chr1	200738568	200739319	USR
chr1	200802674	200803027	USR
chr1	201126764	201127334	USR
chr1	201170585	201171464	USR
chr1	201739406	201739735	USR
chr1	201955039	201955671	USR
chr1	202007113	202007378	USR
chr1	202008111	202008689	USR
chr1	202009792	202010506	USR
chr1	202018531	202018824	USR
chr1	202022748	202023492	USR
chr1	202064538	202064808	USR
chr1	202105728	202106219	USR
chr1	202283213	202283994	USR
chr1	202861245	202861928	USR
chr1	203327353	203327957	USR
chr1	203487620	203487870	USR
chr1	203661567	203661958	USR
chr1	204080245	204080507	USR
chr1	204417305	204418001	USR
chr1	204493739	204494366	USR
chr1	205121820	205122336	USR
chr1	205441032	205441985	USR
chr1	205457083	205457630	USR
chr1	205748996	205749626	USR
chr1	206204754	206205212	USR
chr1	206325935	206326711	USR
chr1	206351462	206351962	USR
chr1	206356299	206356757	USR
chr1	207050794	207051308	USR
chr1	207052766	207053312	USR
chr1	207321142	207321676	USR
chr1	207748587	207749273	USR
chr1	209649333	209649748	USR
chr1	209827594	209827886	USR
chr1	210251089	210251449	USR
chr1	210310998	210311569	USR
chr1	210329010	210329436	USR
chr1	210373735	210374354	USR
chr1	211258820	211259279	USR
chr1	212030788	212031064	USR
chr1	212290434	212291129	USR
chr1	212608146	212608906	USR
chr1	212857704	212858143	USR
chr1	213110031	213110517	USR
chr1	214261412	214262159	USR
chr1	214404324	214405087	USR
chr1	214414625	214415094	USR
chr1	214466725	214467604	USR
chr1	214475942	214476604	USR
chr1	214507089	214507475	USR
chr1	214516271	214516850	USR
chr1	214551968	214552359	USR
chr1	214602782	214603349	USR
chr1	215594929	215595350	USR
chr1	217630872	217631528	USR
chr1	218674072	218674962	USR
chr1	219710677	219711199	USR
chr1	219790899	219791814	USR
chr1	219812657	219813054	USR
chr1	220089983	220090410	USR
chr1	222243809	222244479	USR
chr1	222711917	222713205	USR
chr1	222994517	222995670	USR
chr1	223190182	223190806	USR
chr1	223233463	223234184	USR
chr1	223846084	223846475	USR
chr1	224113670	224113966	USR
chr1	224182648	224183368	USR
chr1	225428187	225428896	USR
chr1	225508279	225509077	USR
chr1	225655638	225656116	USR
chr1	225777900	225778214	USR
chr1	225817818	225818085	USR
chr1	225924304	225924681	USR
chr1	225999413	225999869	USR
chr1	226064537	226065193	USR
chr1	226333156	226333839	USR
chr1	226939729	226940467	USR
chr1	227563488	227564091	USR
chr1	227946535	227947030	USR
chr1	228131020	228131428	USR
chr1	228139700	228140163	USR
chr1	228165738	228166086	USR
chr1	228457338	228457938	USR
chr1	228486937	228487307	USR
chr1	228664192	228664529	USR
chr1	228736080	228736677	USR
chr1	228831089	228831579	USR
chr1	229229192	229229561	USR
chr1	230185935	230186909	USR
chr1	230702966	230703439	USR
chr1	230824807	230825452	USR
chr1	230978838	230979177	USR
chr1	231395520	231396102	USR
chr1	231512159	231512672	USR
chr1	232538127	232538783	USR
chr1	232622211	232623171	USR
chr1	232678333	232678930	USR
chr1	233261181	233261570	USR
chr1	233295165	233296200	USR
chr1	233707439	233707730	USR
chr1	233993453	233994135	USR
chr1	234206867	234207313	USR
chr1	234564518	234564849	USR
chr1	234601650	234602116	USR
chr1	234611162	234611948	USR
chr1	234659423	234659969	USR
chr1	234726728	234727227	USR
chr1	234980359	234981118	USR
chr1	235296160	235296508	USR
chr1	235367077	235367538	USR
chr1	235642254	235642769	USR
chr1	235734287	235734863	USR
chr1	235867114	235867417	USR
chr1	236905045	236905514	USR
chr1	244599880	244600378	USR
chr1	244801114	244801704	USR
chr1	244970223	244971303	USR
chr1	245234979	245235256	USR
chr1	246142297	246142785	USR
chr1	246156770	246157396	USR
chr1	247007968	247008416	USR
chr1	248837905	248839017	USR
chr1	248906112	248906488	USR
chr1	1347650	1348274	1-20%
chr1	1433459	1434447	1-20%
chr1	1918897	1919712	1-20%
chr1	3312952	3313770	1-20%
chr1	3530978	3531440	1-20%
chr1	3900388	3901664	1-20%
chr1	6602971	6603895	1-20%
chr1	6612572	6613735	1-20%
chr1	6624732	6625189	1-20%
chr1	6784301	6785343	1-20%
chr1	6962660	6963700	1-20%
chr1	7300876	7301433	1-20%
chr1	7401718	7402129	1-20%
chr1	7549156	7550033	1-20%
chr1	8027910	8029057	1-20%
chr1	8070004	8070884	1-20%
chr1	8076848	8078971	1-20%
chr1	8090051	8090684	1-20%
chr1	8117785	8118692	1-20%
chr1	8122573	8122808	1-20%
chr1	8137552	8138343	1-20%
chr1	8193808	8195138	1-20%
chr1	8197493	8198349	1-20%
chr1	8202014	8202981	1-20%
chr1	8211682	8212541	1-20%
chr1	8231675	8232711	1-20%
chr1	8424030	8424828	1-20%
chr1	8712355	8713285	1-20%
chr1	8889633	8890650	1-20%
chr1	9234192	9234623	1-20%
chr1	9412839	9413996	1-20%
chr1	9910265	9911154	1-20%
chr1	10107931	10108855	1-20%
chr1	10230388	10231072	1-20%
chr1	10398686	10399569	1-20%
chr1	11478854	11479174	1-20%
chr1	11907708	11909871	1-20%
chr1	12178794	12179445	1-20%
chr1	12475479	12476024	1-20%
chr1	12540019	12540592	1-20%
chr1	12549683	12550378	1-20%
chr1	12573596	12574313	1-20%
chr1	13766912	13767347	1-20%
chr1	15139648	15140413	1-20%
chr1	15142044	15142419	1-20%
chr1	15152272	15153667	1-20%
chr1	15173644	15175071	1-20%
chr1	15200292	15201166	1-20%
chr1	15795011	15795775	1-20%
chr1	15799994	15801153	1-20%
chr1	15833409	15836247	1-20%
chr1	16143582	16144353	1-20%
chr1	16155716	16156752	1-20%
chr1	16367116	16367692	1-20%
chr1	16545588	16546333	1-20%
chr1	16666888	16667527	1-20%
chr1	16700357	16701777	1-20%
chr1	16872616	16873060	1-20%
chr1	16896337	16896702	1-20%
chr1	17233076	17233816	1-20%
chr1	17259033	17259934	1-20%
chr1	17529739	17530514	1-20%
chr1	18902556	18903192	1-20%
chr1	19010506	19011774	1-20%
chr1	19430065	19430814	1-20%
chr1	19925156	19927235	1-20%
chr1	20494614	20495743	1-20%
chr1	20496002	20496868	1-20%
chr1	20613626	20614389	1-20%
chr1	21091209	21091713	1-20%
chr1	21261734	21262399	1-20%
chr1	21324275	21325122	1-20%
chr1	21782708	21783619	1-20%
chr1	22024457	22026542	1-20%
chr1	23108843	23109555	1-20%
chr1	23376995	23377778	1-20%
chr1	23555203	23556846	1-20%
chr1	23559564	23559969	1-20%
chr1	24283648	24284516	1-20%
chr1	24515524	24515933	1-20%
chr1	24683562	24684283	1-20%
chr1	24744841	24745560	1-20%
chr1	25167221	25168998	1-20%
chr1	25343604	25344085	1-20%
chr1	25568229	25569033	1-20%
chr1	25861477	25861805	1-20%
chr1	26111894	26112221	1-20%
chr1	26123334	26123825	1-20%
chr1	26176953	26177573	1-20%
chr1	26861613	26863644	1-20%
chr1	26864506	26865529	1-20%
chr1	27012843	27013558	1-20%
chr1	27365692	27366266	1-20%
chr1	27490304	27490575	1-20%
chr1	28248431	28249862	1-20%
chr1	28351333	28352523	1-20%
chr1	28437385	28438383	1-20%
chr1	28500939	28501494	1-20%
chr1	28828336	28828968	1-20%
chr1	28960035	28960559	1-20%
chr1	28972026	28972669	1-20%
chr1	29569861	29570505	1-20%
chr1	30525775	30526515	1-20%
chr1	30717966	30718507	1-20%
chr1	30823651	30824663	1-20%
chr1	31549100	31549664	1-20%
chr1	31574158	31576712	1-20%
chr1	31714626	31715747	1-20%
chr1	31934929	31935446	1-20%
chr1	32072714	32073465	1-20%
chr1	32133256	32133855	1-20%
chr1	32447706	32449734	1-20%
chr1	33472174	33472631	1-20%
chr1	33516503	33517071	1-20%
chr1	35505974	35506495	1-20%
chr1	36155685	36156143	1-20%
chr1	36224206	36224855	1-20%
chr1	36386041	36386876	1-20%
chr1	37471519	37472314	1-20%
chr1	37931536	37931995	1-20%
chr1	39185368	39186112	1-20%
chr1	39191994	39192707	1-20%
chr1	39387390	39388096	1-20%
chr1	39398367	39399363	1-20%
chr1	39408269	39409147	1-20%
chr1	39606036	39606624	1-20%
chr1	39901702	39902638	1-20%
chr1	40646140	40646849	1-20%
chr1	40708984	40709256	1-20%
chr1	40967605	40968199	1-20%
chr1	41109275	41110033	1-20%
chr1	41783254	41783847	1-20%
chr1	41840766	41841639	1-20%
chr1	42823718	42824190	1-20%
chr1	42966943	42967533	1-20%
chr1	43349188	43349764	1-20%
chr1	43372464	43373732	1-20%
chr1	43452798	43453652	1-20%
chr1	43649909	43650412	1-20%
chr1	44029783	44030493	1-20%
chr1	44327531	44328365	1-20%
chr1	44673898	44674760	1-20%
chr1	44799928	44800237	1-20%
chr1	44807191	44807815	1-20%
chr1	45303403	45304390	1-20%
chr1	45339693	45340418	1-20%
chr1	45500012	45500681	1-20%
chr1	45583557	45583872	1-20%
chr1	46183018	46183744	1-20%
chr1	50620810	50621342	1-20%
chr1	51569437	51570498	1-20%
chr1	52288050	52288551	1-20%
chr1	53220269	53220575	1-20%
chr1	53412900	53414224	1-20%
chr1	53838013	53838907	1-20%
chr1	54015940	54017093	1-20%
chr1	54542137	54542898	1-20%
chr1	54856289	54856761	1-20%
chr1	58584073	58585009	1-20%
chr1	58883193	58883912	1-20%
chr1	59296608	59297242	1-20%
chr1	59298604	59299583	1-20%
chr1	59556681	59557518	1-20%
chr1	61077570	61078437	1-20%
chr1	61724714	61725915	1-20%
chr1	61742130	61742735	1-20%
chr1	61754357	61754734	1-20%
chr1	62121669	62122641	1-20%
chr1	62230673	62231033	1-20%
chr1	62436316	62436974	1-20%
chr1	63593748	63594470	1-20%
chr1	64343315	64344242	1-20%
chr1	64897845	64898981	1-20%
chr1	66169001	66169517	1-20%
chr1	66229894	66230509	1-20%
chr1	66265714	66267411	1-20%
chr1	66292184	66293357	1-20%
chr1	66299797	66303350	1-20%
chr1	66346850	66347278	1-20%
chr1	66924871	66925694	1-20%
chr1	66929836	66930174	1-20%
chr1	67430589	67430932	1-20%
chr1	67700021	67701278	1-20%
chr1	67713342	67713935	1-20%
chr1	67749413	67750599	1-20%
chr1	67979072	67979568	1-20%
chr1	68314095	68314557	1-20%
chr1	68330674	68331520	1-20%
chr1	68377743	68379277	1-20%
chr1	70410619	70411140	1-20%
chr1	70429335	70430421	1-20%
chr1	75775572	75776133	1-20%
chr1	76237604	76238818	1-20%
chr1	76254317	76255032	1-20%
chr1	76998748	76999253	1-20%
chr1	77321943	77322456	1-20%
chr1	78101652	78102464	1-20%
chr1	80534917	80535577	1-20%
chr1	82631964	82632738	1-20%
chr1	84143898	84144701	1-20%
chr1	84159206	84160759	1-20%
chr1	84247170	84248154	1-20%
chr1	84253721	84255061	1-20%
chr1	84271386	84272621	1-20%
chr1	84406732	84407278	1-20%
chr1	84433163	84434916	1-20%
chr1	84598446	84599887	1-20%
chr1	84603336	84604734	1-20%
chr1	84619373	84620296	1-20%
chr1	84892973	84893582	1-20%
chr1	85297754	85298395	1-20%
chr1	85628836	85630102	1-20%
chr1	85849976	85850998	1-20%
chr1	86774552	86775253	1-20%
chr1	86914080	86915028	1-20%
chr1	87329636	87331745	1-20%
chr1	88327581	88328269	1-20%
chr1	88773849	88774459	1-20%
chr1	88985068	88986119	1-20%
chr1	88992771	88993169	1-20%
chr1	89865660	89866505	1-20%
chr1	91500926	91501376	1-20%
chr1	91732508	91732908	1-20%
chr1	92784871	92785709	1-20%
chr1	93664519	93664742	1-20%
chr1	93693127	93693831	1-20%
chr1	93737901	93738658	1-20%
chr1	93779689	93779976	1-20%
chr1	93847280	93848349	1-20%
chr1	94281151	94282097	1-20%
chr1	94299849	94301558	1-20%
chr1	94309952	94311133	1-20%
chr1	94325411	94326488	1-20%
chr1	94605178	94606557	1-20%
chr1	94862611	94864842	1-20%
chr1	95116915	95117352	1-20%
chr1	96362439	96363045	1-20%
chr1	97277713	97278372	1-20%
chr1	97384330	97385252	1-20%
chr1	99756577	99757222	1-20%
chr1	100351420	100352675	1-20%
chr1	108720126	108720412	1-20%
chr1	110003779	110004309	1-20%
chr1	110338218	110339333	1-20%
chr1	110477018	110477878	1-20%
chr1	112707213	112707757	1-20%
chr1	113072737	113073551	1-20%
chr1	113307565	113308557	1-20%
chr1	113456895	113457517	1-20%
chr1	113811934	113812549	1-20%
chr1	113887533	113888435	1-20%
chr1	113904587	113905493	1-20%
chr1	114669913	114670461	1-20%
chr1	115545918	115546559	1-20%
chr1	116642486	116643760	1-20%
chr1	119140059	119140773	1-20%
chr1	119675338	119675704	1-20%
chr1	120558576	120559027	1-20%
chr1	120851333	120851605	1-20%
chr1	120941484	120942951	1-20%
chr1	121097353	121097604	1-20%
chr1	122966736	122967248	1-20%
chr1	143971855	143973045	1-20%
chr1	144551924	144552160	1-20%
chr1	145094871	145096095	1-20%
chr1	145281175	145281837	1-20%
chr1	145978689	145980095	1-20%
chr1	146012952	146013413	1-20%
chr1	146036467	146036972	1-20%
chr1	146037348	146039640	1-20%
chr1	146297971	146298838	1-20%
chr1	146409375	146410689	1-20%
chr1	147538793	147539471	1-20%
chr1	148402119	148402610	1-20%
chr1	148522011	148522300	1-20%
chr1	148951439	148952350	1-20%
chr1	149635745	149637237	1-20%
chr1	149887749	149888805	1-20%
chr1	149939001	149939713	1-20%
chr1	150363669	150364507	1-20%
chr1	150515362	150515990	1-20%
chr1	150604660	150605188	1-20%
chr1	150629319	150630397	1-20%
chr1	150875965	150877093	1-20%
chr1	151195139	151196503	1-20%
chr1	151281258	151282424	1-20%
chr1	151311827	151312306	1-20%
chr1	151347039	151347823	1-20%
chr1	151494670	151495274	1-20%
chr1	151508759	151509431	1-20%
chr1	151539505	151540402	1-20%
chr1	151992042	151993353	1-20%
chr1	151993622	151995091	1-20%
chr1	153099703	153100377	1-20%
chr1	153568007	153569080	1-20%
chr1	153670574	153672220	1-20%
chr1	153783434	153783948	1-20%
chr1	153963345	153964432	1-20%
chr1	153986435	153987323	1-20%
chr1	153990387	153990619	1-20%
chr1	154417923	154418758	1-20%
chr1	155000899	155002487	1-20%
chr1	155084894	155085731	1-20%
chr1	155650682	155651615	1-20%
chr1	155688796	155689054	1-20%
chr1	156692806	156693676	1-20%
chr1	156705875	156707074	1-20%
chr1	160989916	160990783	1-20%
chr1	160995630	160996598	1-20%
chr1	161132580	161133211	1-20%
chr1	161225649	161226018	1-20%
chr1	161612019	161612973	1-20%
chr1	161765558	161766119	1-20%
chr1	162074342	162074670	1-20%
chr1	162128721	162129582	1-20%
chr1	162349726	162350077	1-20%
chr1	162561145	162561723	1-20%
chr1	162690790	162691336	1-20%
chr1	164748056	164749035	1-20%
chr1	167173737	167174344	1-20%
chr1	167267663	167267979	1-20%
chr1	167936114	167936642	1-20%
chr1	168392003	168392466	1-20%
chr1	169485715	169486525	1-20%
chr1	169899278	169900193	1-20%
chr1	170074448	170075235	1-20%
chr1	170531214	170532586	1-20%
chr1	170707779	170708793	1-20%
chr1	171916085	171917103	1-20%
chr1	172254929	172255506	1-20%
chr1	172352400	172352622	1-20%
chr1	172532235	172533409	1-20%
chr1	172746020	172746946	1-20%
chr1	172893447	172893963	1-20%
chr1	172903320	172904410	1-20%
chr1	172906882	172907694	1-20%
chr1	173042678	173043561	1-20%
chr1	173476818	173477147	1-20%
chr1	174204551	174205593	1-20%
chr1	174998808	174999845	1-20%
chr1	175169187	175170295	1-20%
chr1	175171773	175172228	1-20%
chr1	178092985	178093975	1-20%
chr1	179017063	179017430	1-20%
chr1	179143013	179143801	1-20%
chr1	181033445	181033914	1-20%
chr1	181103948	181105393	1-20%
chr1	181112404	181113226	1-20%
chr1	181325004	181325476	1-20%
chr1	182029402	182030284	1-20%
chr1	183163269	183163630	1-20%
chr1	183234411	183235143	1-20%
chr1	184002069	184002716	1-20%
chr1	185257357	185258362	1-20%
chr1	185317470	185317701	1-20%
chr1	188237664	188238096	1-20%
chr1	192002836	192003105	1-20%
chr1	192530765	192531560	1-20%
chr1	192974655	192975385	1-20%
chr1	192978150	192980800	1-20%
chr1	193059453	193060060	1-20%
chr1	193115600	193116055	1-20%
chr1	195591870	195592770	1-20%
chr1	198443088	198443870	1-20%
chr1	199272072	199273366	1-20%
chr1	200415794	200416712	1-20%
chr1	200483378	200484008	1-20%
chr1	200620639	200621716	1-20%
chr1	200640682	200641585	1-20%
chr1	200891031	200891668	1-20%
chr1	201396977	201397316	1-20%
chr1	201714305	201714694	1-20%
chr1	202028990	202029926	1-20%
chr1	202034593	202035508	1-20%
chr1	202056735	202057666	1-20%
chr1	202085144	202085813	1-20%
chr1	202107047	202107998	1-20%
chr1	202341895	202342334	1-20%
chr1	202380089	202381059	1-20%
chr1	202888636	202889459	1-20%
chr1	203177240	203178693	1-20%
chr1	203888645	203890146	1-20%
chr1	204479782	204480077	1-20%
chr1	204506166	204507017	1-20%
chr1	204515950	204517018	1-20%
chr1	205175655	205176068	1-20%
chr1	205374657	205375205	1-20%
chr1	205449804	205450617	1-20%
chr1	205749840	205750639	1-20%
chr1	206000849	206001669	1-20%
chr1	206288251	206288819	1-20%
chr1	206358710	206359689	1-20%
chr1	207026981	207027311	1-20%
chr1	207232488	207233100	1-20%
chr1	210233512	210234401	1-20%
chr1	211515198	211515789	1-20%
chr1	211579085	211579980	1-20%
chr1	211675411	211676165	1-20%
chr1	211735049	211736242	1-20%
chr1	212284544	212285346	1-20%
chr1	212561604	212562073	1-20%
chr1	212596014	212596869	1-20%
chr1	213443352	213443885	1-20%
chr1	213569676	213570150	1-20%
chr1	214101444	214103607	1-20%
chr1	214380119	214380750	1-20%
chr1	215113991	215114882	1-20%
chr1	218377098	218377636	1-20%
chr1	218584815	218586029	1-20%
chr1	218658347	218659379	1-20%
chr1	218660425	218661133	1-20%
chr1	218706033	218706656	1-20%
chr1	219310059	219311047	1-20%
chr1	222643713	222644551	1-20%
chr1	222817465	222817982	1-20%
chr1	223700385	223701699	1-20%
chr1	223707150	223708386	1-20%
chr1	223771665	223772569	1-20%
chr1	224542621	224543409	1-20%
chr1	225603272	225604534	1-20%
chr1	225699812	225701276	1-20%
chr1	225710662	225711339	1-20%
chr1	225875305	225875932	1-20%
chr1	226816413	226817043	1-20%
chr1	227395392	227397691	1-20%
chr1	227934855	227935266	1-20%
chr1	228647199	228648315	1-20%
chr1	228838141	228839146	1-20%
chr1	228860748	228861468	1-20%
chr1	229064125	229065073	1-20%
chr1	229220882	229221920	1-20%
chr1	229230541	229232083	1-20%
chr1	229252839	229254024	1-20%
chr1	230104852	230105169	1-20%
chr1	231219726	231220286	1-20%
chr1	231233472	231234447	1-20%
chr1	232377021	232377660	1-20%
chr1	232529715	232530085	1-20%
chr1	232613517	232614245	1-20%
chr1	233112855	233113947	1-20%
chr1	233654951	233655275	1-20%
chr1	233668746	233669253	1-20%
chr1	234597894	234598236	1-20%
chr1	234600453	234601008	1-20%
chr1	234602675	234605127	1-20%
chr1	234612276	234613091	1-20%
chr1	234866306	234866564	1-20%
chr1	234956975	234957989	1-20%
chr1	234974701	234975930	1-20%
chr1	234978240	234979292	1-20%
chr1	235011654	235012199	1-20%
chr1	235067247	235068285	1-20%
chr1	235078989	235080097	1-20%
chr1	235327805	235329261	1-20%
chr1	235408742	235409795	1-20%
chr1	235902687	235903627	1-20%
chr1	235910072	235911125	1-20%
chr1	235917358	235917739	1-20%
chr1	236471381	236472235	1-20%
chr1	236480725	236481585	1-20%
chr1	236604597	236605060	1-20%
chr1	241707047	241707524	1-20%
chr1	243255044	243256348	1-20%
chr1	243267663	243269142	1-20%
chr1	244048024	244048528	1-20%
chr1	244322782	244323499	1-20%
chr1	244353668	244354166	1-20%
chr1	245091915	245092378	1-20%
chr1	245986501	245987311	1-20%
chr1	246139484	246140358	1-20%
chr1	246153747	246154676	1-20%
chr1	246698868	246699374	1-20%
chr1	248873040	248874167	1-20%
chr1	1745846	1747052	21-40%
chr1	2139847	2140466	21-40%
chr1	8094602	8098297	21-40%
chr1	8133337	8134517	21-40%
chr1	15178594	15179527	21-40%
chr1	16172945	16174060	21-40%
chr1	16903384	16906001	21-40%
chr1	21022016	21023064	21-40%
chr1	33433153	33434795	21-40%
chr1	39183118	39184858	21-40%
chr1	40107255	40108056	21-40%
chr1	41954365	41956401	21-40%
chr1	44532013	44533078	21-40%
chr1	44545878	44546993	21-40%
chr1	44730457	44732288	21-40%
chr1	45891877	45893024	21-40%
chr1	51636996	51637608	21-40%
chr1	55428913	55429789	21-40%
chr1	60281557	60282377	21-40%
chr1	61914527	61915638	21-40%
chr1	63661736	63663400	21-40%
chr1	66230954	66232034	21-40%
chr1	66297916	66299398	21-40%
chr1	66348803	66350920	21-40%
chr1	66542652	66544121	21-40%
chr1	68384045	68386078	21-40%
chr1	84172687	84175095	21-40%
chr1	84347688	84349115	21-40%
chr1	94067732	94069984	21-40%
chr1	116508571	116509766	21-40%
chr1	154936697	154937703	21-40%
chr1	154973548	154975282	21-40%
chr1	161165878	161166718	21-40%
chr1	168407975	168409718	21-40%
chr1	169105572	169106604	21-40%
chr1	172870744	172871683	21-40%
chr1	172885557	172886992	21-40%
chr1	206202954	206203818	21-40%
chr1	212566766	212567764	21-40%
chr1	213122906	213124447	21-40%
chr1	214445251	214447548	21-40%
chr1	218823108	218824116	21-40%
chr1	221439246	221440995	21-40%
chr1	221741925	221743271	21-40%
chr1	226442967	226444526	21-40%
chr1	226814906	226815814	21-40%
chr1	227805572	227806473	21-40%
chr1	234771941	234773032	21-40%
chr1	234996949	234999183	21-40%
chr1	7265587	7266765	41-60%
chr1	8120534	8121748	41-60%
chr1	9163426	9164506	41-60%
chr1	12477647	12479070	41-60%
chr1	15353894	15357083	41-60%
chr1	24321338	24322916	41-60%
chr1	43007569	43009364	41-60%
chr1	56688058	56689300	41-60%
chr1	66323450	66325292	41-60%
chr1	68550749	68552417	41-60%
chr1	151972444	151973714	41-60%
chr1	152047364	152048959	41-60%
chr1	168405482	168407160	41-60%
chr1	172837819	172839229	41-60%
chr1	178238180	178239676	41-60%
chr1	199758772	199760066	41-60%
chr1	204057082	204058705	41-60%
chr1	234723007	234725410	41-60%
chr1	244833195	244835564	41-60%
chr1	8181948	8183243	61-80%
chr1	24364457	24366028	61-80%
chr1	39116590	39118458	61-80%
chr1	66294389	66296803	61-80%
chr1	68322080	68324406	61-80%
chr1	84144962	84147479	61-80%
chr1	84155272	84157628	61-80%
chr1	1692486	1693717	81-100%
chr1	84364903	84366411	81-100%
chr1	213175171	213177768	81-100%
chr1_KI270713v1_random	28094	28668	1-20%
chr1_KI270714v1_random	26199	27757	1-20%
chr10	511199	511435	USR
chr10	1050147	1050689	USR
chr10	3226802	3227353	USR
chr10	3248611	3249301	USR
chr10	3482260	3482938	USR
chr10	3762797	3763589	USR
chr10	4344204	4345103	USR
chr10	4704237	4704683	USR
chr10	4826121	4826481	USR
chr10	5547697	5548413	USR
chr10	6052461	6053067	USR
chr10	6144651	6144936	USR
chr10	6239088	6239390	USR
chr10	6299545	6299924	USR
chr10	6401503	6401917	USR
chr10	7649838	7650099	USR
chr10	7687167	7687524	USR
chr10	11875497	11876185	USR
chr10	12042964	12043341	USR
chr10	12333331	12334282	USR
chr10	12727206	12727446	USR
chr10	12983552	12984276	USR
chr10	13099536	13099868	USR
chr10	13302139	13302705	USR
chr10	13347998	13348647	USR
chr10	13586607	13586939	USR
chr10	14601941	14602428	USR
chr10	14658478	14658780	USR
chr10	14954193	14954452	USR
chr10	14959390	14960177	USR
chr10	15167682	15168344	USR
chr10	15211295	15211775	USR
chr10	16436962	16437228	USR
chr10	17200795	17201820	USR
chr10	17215057	17215845	USR
chr10	17228254	17228821	USR
chr10	17290254	17290748	USR
chr10	17353344	17354054	USR
chr10	17655536	17657205	USR
chr10	17981985	17982421	USR
chr10	17983778	17984736	USR
chr10	18005510	18006598	USR
chr10	18610730	18611071	USR
chr10	18660004	18660634	USR
chr10	21191381	21192141	USR
chr10	21194401	21195502	USR
chr10	21335132	21335531	USR
chr10	21365874	21366564	USR
chr10	21527573	21528184	USR
chr10	22316449	22316979	USR
chr10	22615831	22616596	USR
chr10	24483500	24484166	USR
chr10	24642951	24643493	USR
chr10	24892118	24892437	USR
chr10	24958039	24958728	USR
chr10	25294032	25294700	USR
chr10	26324338	26324930	USR
chr10	27742006	27742319	USR
chr10	28105392	28106523	USR
chr10	28123979	28125294	USR
chr10	28214024	28214582	USR
chr10	28215690	28216344	USR
chr10	28302721	28303250	USR
chr10	28322077	28322370	USR
chr10	28432099	28432602	USR
chr10	28677509	28678080	USR
chr10	29438263	29438839	USR
chr10	29688375	29689110	USR
chr10	29757851	29758328	USR
chr10	30056595	30058019	USR
chr10	30464034	30464448	USR
chr10	31031680	31032436	USR
chr10	31099626	31100114	USR
chr10	31100788	31101296	USR
chr10	31318360	31319018	USR
chr10	31353552	31354096	USR
chr10	31758882	31759492	USR
chr10	31912538	31912784	USR
chr10	31927298	31928169	USR
chr10	31944960	31945416	USR
chr10	32346326	32347106	USR
chr10	32377271	32377941	USR
chr10	32379491	32379742	USR
chr10	32958092	32958753	USR
chr10	32961823	32963521	USR
chr10	32980186	32981201	USR
chr10	33145424	33146460	USR
chr10	33291913	33292449	USR
chr10	34526752	34527477	USR
chr10	34528119	34528963	USR
chr10	35126850	35127158	USR
chr10	35195429	35196187	USR
chr10	37857774	37858191	USR
chr10	38356073	38356753	USR
chr10	38869079	38869336	USR
chr10	41179983	41180253	USR
chr10	41839571	41839929	USR
chr10	42665032	42665526	USR
chr10	42753297	42753622	USR
chr10	43203520	43203825	USR
chr10	44959236	44959647	USR
chr10	44981394	44981618	USR
chr10	45249753	45250176	USR
chr10	45672227	45673167	USR
chr10	46634901	46635795	USR
chr10	47384127	47384633	USR
chr10	47402714	47403092	USR
chr10	47406480	47407496	USR
chr10	47706047	47706443	USR
chr10	47987808	47988405	USR
chr10	50605365	50605734	USR
chr10	50622401	50622785	USR
chr10	50846747	50847189	USR
chr10	52334555	52335014	USR
chr10	52376888	52377470	USR
chr10	52452513	52452962	USR
chr10	58237390	58237981	USR
chr10	58268051	58268301	USR
chr10	58810903	58811765	USR
chr10	60578215	60578598	USR
chr10	60778065	60778597	USR
chr10	61001136	61001409	USR
chr10	61752239	61752863	USR
chr10	61786358	61787045	USR
chr10	61898135	61898802	USR
chr10	61899078	61899355	USR
chr10	62268482	62269119	USR
chr10	62732889	62733373	USR
chr10	62804499	62804950	USR
chr10	63132942	63133296	USR
chr10	63267668	63267991	USR
chr10	63268939	63269552	USR
chr10	63699796	63700884	USR
chr10	63703091	63703773	USR
chr10	67492454	67492975	USR
chr10	67764656	67765465	USR
chr10	68093960	68094591	USR
chr10	68153669	68154150	USR
chr10	68328478	68328847	USR
chr10	68600267	68600632	USR
chr10	68955656	68956032	USR
chr10	69153676	69154230	USR
chr10	69458645	69459247	USR
chr10	69861402	69861981	USR
chr10	70146863	70147088	USR
chr10	70233471	70233852	USR
chr10	70255928	70256665	USR
chr10	70331646	70332426	USR
chr10	70477100	70477834	USR
chr10	70575632	70577035	USR
chr10	70816369	70816793	USR
chr10	71246743	71247172	USR
chr10	71319252	71319902	USR
chr10	71767037	71767837	USR
chr10	71871316	71871716	USR
chr10	71956047	71956412	USR
chr10	72028101	72028610	USR
chr10	72216075	72216386	USR
chr10	72260848	72261677	USR
chr10	72273259	72273894	USR
chr10	72330988	72331309	USR
chr10	72676506	72676875	USR
chr10	72817946	72818876	USR
chr10	73252831	73253385	USR
chr10	73591434	73592384	USR
chr10	73744015	73744270	USR
chr10	73811545	73811970	USR
chr10	73906524	73907137	USR
chr10	73932414	73932905	USR
chr10	73965594	73966817	USR
chr10	74079579	74080251	USR
chr10	74502758	74503748	USR
chr10	74558273	74559303	USR
chr10	75401442	75403724	USR
chr10	76050889	76051567	USR
chr10	76082944	76083466	USR
chr10	77168802	77169167	USR
chr10	78033328	78033679	USR
chr10	78927107	78927585	USR
chr10	78973287	78974019	USR
chr10	78974639	78974880	USR
chr10	79066653	79067143	USR
chr10	79347051	79347434	USR
chr10	80407978	80408398	USR
chr10	80460631	80461092	USR
chr10	80493480	80494074	USR
chr10	85641519	85642042	USR
chr10	86535355	86535839	USR
chr10	86970981	86972236	USR
chr10	87025271	87026148	USR
chr10	88793689	88794214	USR
chr10	88880178	88880752	USR
chr10	88883357	88883838	USR
chr10	88990571	88990939	USR
chr10	89644127	89644522	USR
chr10	89645200	89645535	USR
chr10	90088734	90089083	USR
chr10	90150341	90150963	USR
chr10	90222306	90223025	USR
chr10	90319094	90320312	USR
chr10	91410085	91410638	USR
chr10	91652198	91652929	USR
chr10	91908727	91909627	USR
chr10	92222864	92223331	USR
chr10	92243079	92243606	USR
chr10	92590951	92592081	USR
chr10	93073665	93073951	USR
chr10	93376619	93376885	USR
chr10	93384171	93384593	USR
chr10	93465709	93466589	USR
chr10	93468226	93468955	USR
chr10	93482152	93482996	USR
chr10	93496105	93496686	USR
chr10	94358465	94358968	USR
chr10	94402285	94402701	USR
chr10	95235992	95236437	USR
chr10	95264398	95264638	USR
chr10	95308405	95309198	USR
chr10	95467183	95467654	USR
chr10	95528986	95529504	USR
chr10	95656598	95657016	USR
chr10	96043276	96043569	USR
chr10	96118514	96119293	USR
chr10	96124299	96124915	USR
chr10	96831332	96832033	USR
chr10	96863835	96864494	USR
chr10	97292102	97292738	USR
chr10	97541920	97542531	USR
chr10	97543253	97543888	USR
chr10	97649244	97649521	USR
chr10	99430693	99431005	USR
chr10	99659037	99659447	USR
chr10	99684741	99685001	USR
chr10	99731879	99732857	USR
chr10	99783941	99785589	USR
chr10	99932667	99932975	USR
chr10	99963439	99963879	USR
chr10	99976982	99977429	USR
chr10	100186045	100186510	USR
chr10	100286187	100286652	USR
chr10	100728922	100729876	USR
chr10	100881395	100881922	USR
chr10	100890632	100890990	USR
chr10	100912691	100913514	USR
chr10	101032460	101032784	USR
chr10	101042890	101043424	USR
chr10	101066016	101066911	USR
chr10	101190992	101191491	USR
chr10	101353534	101354041	USR
chr10	101569937	101570281	USR
chr10	101818273	101818974	USR
chr10	101939079	101939852	USR
chr10	102132656	102133144	USR
chr10	102151774	102152114	USR
chr10	102169662	102169927	USR
chr10	102245136	102245655	USR
chr10	102394111	102394819	USR
chr10	102450100	102450594	USR
chr10	102607420	102607799	USR
chr10	102641929	102643170	USR
chr10	102854230	102854517	USR
chr10	102917706	102918494	USR
chr10	103232871	103233347	USR
chr10	103450652	103451451	USR
chr10	103745487	103745829	USR
chr10	103772428	103772971	USR
chr10	103888272	103889142	USR
chr10	103890188	103890723	USR
chr10	104049489	104049972	USR
chr10	104128319	104128711	USR
chr10	104232098	104232457	USR
chr10	104331285	104331616	USR
chr10	104809203	104810245	USR
chr10	110007929	110009057	USR
chr10	110136998	110137647	USR
chr10	110354041	110354441	USR
chr10	110356927	110357399	USR
chr10	110372821	110373139	USR
chr10	110409976	110411463	USR
chr10	110641216	110641712	USR
chr10	110664918	110665685	USR
chr10	110672070	110672560	USR
chr10	110772698	110773068	USR
chr10	112360661	112362425	USR
chr10	112374234	112375770	USR
chr10	112383035	112383601	USR
chr10	112475872	112476446	USR
chr10	112484273	112484653	USR
chr10	112498783	112499492	USR
chr10	112500467	112500960	USR
chr10	112507933	112508594	USR
chr10	112509654	112510068	USR
chr10	112548276	112549673	USR
chr10	112565244	112565767	USR
chr10	112663269	112663870	USR
chr10	112741638	112742750	USR
chr10	112743120	112743706	USR
chr10	112832478	112832980	USR
chr10	112912745	112913034	USR
chr10	112915218	112916006	USR
chr10	112958828	112960398	USR
chr10	113069544	113070131	USR
chr10	113071590	113072697	USR
chr10	113679184	113680091	USR
chr10	114304180	114304647	USR
chr10	114320631	114321183	USR
chr10	114526529	114527153	USR
chr10	114623815	114624729	USR
chr10	114633253	114634049	USR
chr10	117005104	117005688	USR
chr10	117006962	117007207	USR
chr10	117221311	117221629	USR
chr10	117271285	117271571	USR
chr10	117361050	117361722	USR
chr10	117652872	117653475	USR
chr10	118342094	118342860	USR
chr10	118423730	118424238	USR
chr10	118504627	118504993	USR
chr10	118522710	118523136	USR
chr10	118844890	118845350	USR
chr10	118850474	118850778	USR
chr10	119030555	119031211	USR
chr10	119271150	119271785	USR
chr10	120979382	120979742	USR
chr10	121325739	121326458	USR
chr10	121598605	121599052	USR
chr10	122141131	122141681	USR
chr10	123154047	123154370	USR
chr10	124093583	124093880	USR
chr10	124418527	124419357	USR
chr10	124744406	124745164	USR
chr10	124791551	124792156	USR
chr10	125045646	125045952	USR
chr10	125064615	125065074	USR
chr10	125707775	125708334	USR
chr10	127927907	127928333	USR
chr10	132537373	132537691	USR
chr10	133144073	133144364	USR
chr10	784601	784972	1-20%
chr10	1048989	1049854	1-20%
chr10	3094912	3095934	1-20%
chr10	3467269	3469355	1-20%
chr10	3754952	3755604	1-20%
chr10	3776911	3777555	1-20%
chr10	3786209	3787201	1-20%
chr10	3805407	3805962	1-20%
chr10	3809770	3810936	1-20%
chr10	4353848	4354941	1-20%
chr10	4431119	4432112	1-20%
chr10	4671272	4671939	1-20%
chr10	4686374	4687013	1-20%
chr10	4725423	4726638	1-20%
chr10	4770623	4771210	1-20%
chr10	4815216	4816276	1-20%
chr10	5584945	5585388	1-20%
chr10	5861183	5861810	1-20%
chr10	11552000	11552715	1-20%
chr10	11881965	11882199	1-20%
chr10	12270635	12271367	1-20%
chr10	12707127	12708055	1-20%
chr10	12720099	12721092	1-20%
chr10	12727673	12728039	1-20%
chr10	12981535	12982240	1-20%
chr10	15200520	15202158	1-20%
chr10	16891413	16892491	1-20%
chr10	17029214	17030196	1-20%
chr10	17061670	17063587	1-20%
chr10	17216090	17216726	1-20%
chr10	17230240	17230848	1-20%
chr10	17348611	17349212	1-20%
chr10	17650565	17651885	1-20%
chr10	21174191	21175631	1-20%
chr10	21363705	21365247	1-20%
chr10	21533105	21534142	1-20%
chr10	21751153	21751975	1-20%
chr10	22436494	22437749	1-20%
chr10	22617759	22618877	1-20%
chr10	22619967	22621047	1-20%
chr10	22816341	22817161	1-20%
chr10	22822826	22824410	1-20%
chr10	22824630	22825897	1-20%
chr10	24849408	24850064	1-20%
chr10	24897109	24897485	1-20%
chr10	24901764	24902583	1-20%
chr10	24909276	24909578	1-20%
chr10	24944820	24945449	1-20%
chr10	24962726	24963503	1-20%
chr10	25059805	25060437	1-20%
chr10	26781210	26781730	1-20%
chr10	28054283	28054935	1-20%
chr10	28095719	28096958	1-20%
chr10	28111221	28112734	1-20%
chr10	28137820	28139194	1-20%
chr10	28179444	28182153	1-20%
chr10	28254197	28255130	1-20%
chr10	28291723	28292355	1-20%
chr10	28375527	28376306	1-20%
chr10	28839142	28840295	1-20%
chr10	28991211	28992181	1-20%
chr10	29159759	29160603	1-20%
chr10	29634726	29636508	1-20%
chr10	29646026	29646838	1-20%
chr10	29714317	29714677	1-20%
chr10	29784499	29784858	1-20%
chr10	30068528	30069110	1-20%
chr10	30387607	30388106	1-20%
chr10	30433069	30434125	1-20%
chr10	30447097	30447590	1-20%
chr10	30695697	30696131	1-20%
chr10	31146912	31147724	1-20%
chr10	31759821	31760698	1-20%
chr10	31896840	31897865	1-20%
chr10	32056018	32056497	1-20%
chr10	32378332	32378760	1-20%
chr10	32948193	32948973	1-20%
chr10	32982092	32983944	1-20%
chr10	33005055	33006367	1-20%
chr10	33032410	33033178	1-20%
chr10	33133728	33134710	1-20%
chr10	33136055	33137298	1-20%
chr10	33508972	33510113	1-20%
chr10	34124417	34124989	1-20%
chr10	34405472	34406448	1-20%
chr10	34426532	34427725	1-20%
chr10	34731743	34733301	1-20%
chr10	34758625	34758930	1-20%
chr10	34802604	34803447	1-20%
chr10	37975869	37977061	1-20%
chr10	40829709	40829963	1-20%
chr10	43408893	43409183	1-20%
chr10	45882669	45883424	1-20%
chr10	46022357	46023464	1-20%
chr10	46106610	46107318	1-20%
chr10	46589337	46589960	1-20%
chr10	47421186	47421931	1-20%
chr10	49418959	49419448	1-20%
chr10	49538819	49539823	1-20%
chr10	49851974	49852729	1-20%
chr10	50418061	50418848	1-20%
chr10	50511674	50512401	1-20%
chr10	50849869	50850880	1-20%
chr10	52313116	52314537	1-20%
chr10	58268569	58269576	1-20%
chr10	58384913	58385597	1-20%
chr10	58435061	58436271	1-20%
chr10	59906510	59907245	1-20%
chr10	60611386	60612052	1-20%
chr10	60661679	60662193	1-20%
chr10	61760967	61761537	1-20%
chr10	61900339	61901663	1-20%
chr10	61902069	61903845	1-20%
chr10	62426064	62426968	1-20%
chr10	62816434	62817101	1-20%
chr10	63236199	63236808	1-20%
chr10	63466179	63466807	1-20%
chr10	63553323	63554921	1-20%
chr10	63706870	63707782	1-20%
chr10	67115808	67116714	1-20%
chr10	68097026	68097764	1-20%
chr10	68805232	68805532	1-20%
chr10	69217155	69217825	1-20%
chr10	69408309	69408881	1-20%
chr10	69801302	69802474	1-20%
chr10	70222408	70222848	1-20%
chr10	70378063	70378616	1-20%
chr10	70387410	70387812	1-20%
chr10	70634109	70634759	1-20%
chr10	71860168	71861292	1-20%
chr10	72170143	72171725	1-20%
chr10	72173439	72174308	1-20%
chr10	72204307	72205121	1-20%
chr10	72354565	72355409	1-20%
chr10	73111056	73111900	1-20%
chr10	73117724	73118663	1-20%
chr10	73246801	73247296	1-20%
chr10	73887294	73889009	1-20%
chr10	74150741	74151675	1-20%
chr10	74223593	74224828	1-20%
chr10	74917473	74917891	1-20%
chr10	75234369	75235029	1-20%
chr10	75294691	75295737	1-20%
chr10	75404984	75405586	1-20%
chr10	75409087	75409587	1-20%
chr10	75498177	75499040	1-20%
chr10	75959054	75959664	1-20%
chr10	76103060	76103695	1-20%
chr10	77504779	77506464	1-20%
chr10	77513806	77514336	1-20%
chr10	80196404	80196799	1-20%
chr10	80206868	80207806	1-20%
chr10	80289743	80290045	1-20%
chr10	80483318	80484158	1-20%
chr10	80498346	80499388	1-20%
chr10	80505810	80506660	1-20%
chr10	84494102	84494938	1-20%
chr10	85642314	85644287	1-20%
chr10	86046843	86047249	1-20%
chr10	86399906	86400791	1-20%
chr10	87845129	87845972	1-20%
chr10	88428214	88429361	1-20%
chr10	88702704	88703855	1-20%
chr10	88707521	88708506	1-20%
chr10	88848543	88848924	1-20%
chr10	88882227	88882992	1-20%
chr10	88897034	88898171	1-20%
chr10	89032289	89032740	1-20%
chr10	89118041	89118488	1-20%
chr10	89861699	89862191	1-20%
chr10	89921349	89921981	1-20%
chr10	90047010	90047288	1-20%
chr10	90047482	90047736	1-20%
chr10	90089548	90090178	1-20%
chr10	90111492	90112193	1-20%
chr10	90149594	90150100	1-20%
chr10	90306513	90306798	1-20%
chr10	90591589	90592484	1-20%
chr10	90858491	90859852	1-20%
chr10	91923433	91924187	1-20%
chr10	92211119	92211585	1-20%
chr10	92892267	92892968	1-20%
chr10	92965436	92965838	1-20%
chr10	92972103	92972405	1-20%
chr10	93334884	93335396	1-20%
chr10	93421621	93422372	1-20%
chr10	93436072	93437661	1-20%
chr10	93458713	93459423	1-20%
chr10	94104218	94105001	1-20%
chr10	95675409	95676148	1-20%
chr10	96122747	96123445	1-20%
chr10	96267374	96267797	1-20%
chr10	97498190	97498816	1-20%
chr10	97596323	97596987	1-20%
chr10	99620508	99621314	1-20%
chr10	99775659	99778282	1-20%
chr10	99779469	99781288	1-20%
chr10	99781835	99782941	1-20%
chr10	99965991	99966917	1-20%
chr10	100005708	100007147	1-20%
chr10	100043362	100044607	1-20%
chr10	100346603	100347279	1-20%
chr10	100364402	100365307	1-20%
chr10	100370130	100371888	1-20%
chr10	100827145	100828395	1-20%
chr10	101013072	101013318	1-20%
chr10	101060758	101061632	1-20%
chr10	101367496	101368411	1-20%
chr10	101937992	101938725	1-20%
chr10	102229918	102231001	1-20%
chr10	102431767	102432789	1-20%
chr10	102462810	102464151	1-20%
chr10	102604222	102605015	1-20%
chr10	102645035	102646460	1-20%
chr10	102714167	102714934	1-20%
chr10	103193418	103194359	1-20%
chr10	103241246	103241871	1-20%
chr10	103272906	103273410	1-20%
chr10	103908008	103909184	1-20%
chr10	103917848	103918930	1-20%
chr10	104110002	104110397	1-20%
chr10	104329130	104329762	1-20%
chr10	110207299	110207777	1-20%
chr10	110210931	110211504	1-20%
chr10	110221754	110222283	1-20%
chr10	110353333	110353657	1-20%
chr10	110395507	110396658	1-20%
chr10	110398942	110399980	1-20%
chr10	110413904	110415054	1-20%
chr10	110567379	110567917	1-20%
chr10	110918337	110919463	1-20%
chr10	112388084	112390184	1-20%
chr10	112394101	112394857	1-20%
chr10	112523951	112529368	1-20%
chr10	112529912	112531933	1-20%
chr10	112558279	112559331	1-20%
chr10	112650678	112651069	1-20%
chr10	112716989	112717543	1-20%
chr10	112803958	112804939	1-20%
chr10	112949124	112950549	1-20%
chr10	113073225	113074338	1-20%
chr10	113086336	113087789	1-20%
chr10	113093196	113094028	1-20%
chr10	113325964	113326792	1-20%
chr10	114174217	114175040	1-20%
chr10	114487746	114488948	1-20%
chr10	114634291	114635162	1-20%
chr10	114779458	114780897	1-20%
chr10	116742696	116743432	1-20%
chr10	116947122	116947608	1-20%
chr10	117078048	117078875	1-20%
chr10	117186465	117187484	1-20%
chr10	117360039	117360480	1-20%
chr10	117365230	117366232	1-20%
chr10	118698477	118699076	1-20%
chr10	119178546	119179312	1-20%
chr10	119305881	119306689	1-20%
chr10	119316394	119317772	1-20%
chr10	119522844	119523526	1-20%
chr10	119734897	119735480	1-20%
chr10	121158896	121159767	1-20%
chr10	121324758	121325361	1-20%
chr10	121987832	121988479	1-20%
chr10	122063090	122063656	1-20%
chr10	122307415	122308390	1-20%
chr10	122374461	122375561	1-20%
chr10	122494918	122495364	1-20%
chr10	122954016	122954472	1-20%
chr10	123287796	123288295	1-20%
chr10	124105846	124106748	1-20%
chr10	124152405	124153502	1-20%
chr10	124354777	124355269	1-20%
chr10	125661960	125662838	1-20%
chr10	125879237	125879859	1-20%
chr10	125900911	125901624	1-20%
chr10	126521170	126521650	1-20%
chr10	127990977	127991544	1-20%
chr10	128629229	128629977	1-20%
chr10	130110620	130111153	1-20%
chr10	3090903	3091913	21-40%
chr10	3851780	3853516	21-40%
chr10	3889531	3890388	21-40%
chr10	4662771	4664293	21-40%
chr10	21292051	21293917	21-40%
chr10	22246304	22247426	21-40%
chr10	27893288	27893963	21-40%
chr10	28245952	28247417	21-40%
chr10	29658901	29659974	21-40%
chr10	38009781	38011648	21-40%
chr10	42637946	42638918	21-40%
chr10	52317298	52320087	21-40%
chr10	52443225	52444608	21-40%
chr10	63628484	63630897	21-40%
chr10	68135782	68136733	21-40%
chr10	71260003	71261010	21-40%
chr10	73997335	73998128	21-40%
chr10	74826032	74826961	21-40%
chr10	87342394	87343404	21-40%
chr10	90086722	90088226	21-40%
chr10	90147533	90148672	21-40%
chr10	90313282	90315237	21-40%
chr10	90586636	90587765	21-40%
chr10	90847161	90848471	21-40%
chr10	93470817	93471878	21-40%
chr10	93475338	93476722	21-40%
chr10	100372986	100374310	21-40%
chr10	102420585	102421470	21-40%
chr10	102501956	102503968	21-40%
chr10	104093659	104094461	21-40%
chr10	104337929	104339601	21-40%
chr10	110773846	110775434	21-40%
chr10	112379716	112380432	21-40%
chr10	112403895	112405469	21-40%
chr10	112537577	112540151	21-40%
chr10	112657594	112659425	21-40%
chr10	114489133	114490066	21-40%
chr10	119253458	119254519	21-40%
chr10	119596689	119597481	21-40%
chr10	127148121	127149272	21-40%
chr10	11684243	11686246	41-60%
chr10	17511779	17513538	41-60%
chr10	90226527	90228181	41-60%
chr10	99760300	99761656	41-60%
chr10	99930735	99932165	41-60%
chr10	112534989	112537284	41-60%
chr10	112811564	112812682	41-60%
chr10	119314880	119315959	41-60%
chr10	22427036	22429084	61-80%
chr10	28217245	28219926	61-80%
chr10	35040558	35042049	61-80%
chr10	58919433	58921140	61-80%
chr10	61835338	61838136	61-80%
chr10	28118585	28121247	81-100%
chr10	31939788	31942473	81-100%
chr10	63711441	63713909	81-100%
chr10	70577844	70579642	81-100%
chr10	103894587	103897102	81-100%
chr10	104116824	104122267	81-100%
chr10	112331462	112334944	81-100%
chr10	112489821	112492693	81-100%
chr10	112515716	112521628	81-100%
chr11	448227	448631	USR
chr11	576176	576399	USR
chr11	615759	616011	USR
chr11	877572	877859	USR
chr11	1546846	1547254	USR
chr11	1863304	1863717	USR
chr11	2178692	2179375	USR
chr11	2533957	2534562	USR
chr11	2843558	2844153	USR
chr11	2902262	2902617	USR
chr11	2929856	2930919	USR
chr11	2991934	2992359	USR
chr11	3422617	3423128	USR
chr11	3641926	3642563	USR
chr11	3808101	3808521	USR
chr11	3885986	3886287	USR
chr11	4175894	4176375	USR
chr11	4607884	4608520	USR
chr11	5595955	5596355	USR
chr11	5684785	5685087	USR
chr11	8934855	8935607	USR
chr11	8964210	8965246	USR
chr11	9363108	9363655	USR
chr11	9568454	9568974	USR
chr11	9600818	9601288	USR
chr11	9613706	9614159	USR
chr11	10122871	10123382	USR
chr11	10233437	10233851	USR
chr11	10293883	10294361	USR
chr11	10303427	10304377	USR
chr11	10350389	10350826	USR
chr11	10488084	10488575	USR
chr11	10633281	10634038	USR
chr11	10647572	10647982	USR
chr11	10900525	10900835	USR
chr11	11451022	11451465	USR
chr11	11568072	11568423	USR
chr11	12066122	12066641	USR
chr11	12163918	12164736	USR
chr11	12166965	12167559	USR
chr11	12213056	12214452	USR
chr11	12581815	12582304	USR
chr11	12726566	12727197	USR
chr11	12745935	12747031	USR
chr11	12798514	12799259	USR
chr11	12799985	12800793	USR
chr11	12814943	12815482	USR
chr11	13052045	13052696	USR
[truncated: 10,673 more rows]

## Sheet: ICEBERG_Genes_Bcat
A1CF
A4GALT
AAAS
AACS
AADAC
AADACL2
AAED1
AAGAB
AAK1
AANAT
AASDH
AASDHPPT
AASS
AATF
AATK-AS1
ABCA12
ABCA4
ABCA5
ABCA7
ABCA8
ABCB1
ABCB11
ABCB5
ABCB6
ABCB8
ABCB9
ABCC1
ABCC2
ABCC3
ABCC4
ABCC6
ABCD2
ABCD3
ABCD4
ABCE1
ABCF1
ABCG2
ABHD10
ABHD11
ABHD12
ABHD14B
ABHD15
ABHD16A
ABHD17B
ABHD17C
ABHD2
ABHD3
ABHD4
ABHD5
ABHD6
ABHD8
ABI1
ABI2
ABL1
ABL2
ABLIM1
ABLIM2
ABLIM3
ABO
ABR
ABRA
ABT1
ABTB2
ACAA1
ACAA2
ACACA
ACACB
ACAD11
ACADM
ACADVL
ACAP2
ACAP3
ACBD4
ACBD6
ACE
ACER3
ACIN1
ACOT11
ACOT13
ACOT7
ACOX1
ACOXL
ACP6
ACP7
ACPP
ACR
ACSBG2
ACSF2
ACSL1
ACSL3
ACSL4
ACSL5
ACSM6
ACSS1
ACSS2
ACTA2
ACTB
ACTBL2
ACTC1
ACTG1
ACTL7B
ACTL8
ACTN1
ACTN4
ACTR1A
ACTR2
ACTR3
ACTR3B
ACTR5
ACTRT3
ACVR1
ACVR1B
ACVR1C
ACVR2A
ACY1
ACYP2
ADA
ADAD2
ADAM10
ADAM11
ADAM12
ADAM17
ADAM18
ADAM19
ADAM28
ADAM32
ADAM9
ADAMTS14
ADAMTS16
ADAMTS18
ADAMTS20
ADAMTS6
ADAMTS7
ADAMTSL2
ADAMTSL3
ADAMTSL4
ADAMTSL5
ADAP1
ADAT1
ADCY8
ADCY9
ADCYAP1
ADD3
ADGB
ADGRA1
ADGRA3
ADGRB2
ADGRE5
ADGRF1
ADGRF5
ADGRG1
ADGRG4
ADGRG5
ADGRG6
ADGRL1
ADGRL2
ADGRL4
ADGRV1
ADH5
ADHFE1
ADI1
ADIRF
ADK
ADM
ADO
ADORA2A
ADORA2B
ADORA3
ADPRHL1
ADRA1A
ADRA1B
ADRA1D
ADRA2C
ADRB2
ADRM1
ADSL
ADSS
ADTRP
AEBP2
AES
AFAP1
AFAP1L1
AFAP1L2
AFDN
AFF1
AFF3
AFG1L
AFG3L2
AFMID
AFTPH
AGAP1
AGAP3
AGAP4
AGAP9
AGBL2
AGBL5
AGFG2
AGL
AGO2
AGPAT1
AGPAT3
AGPAT4
AGPAT5
AGPS
AGR3
AGRN
AGT
AGTPBP1
AGTR1
AGTR2
AHCY
AHCYL1
AHDC1
AHI1
AHNAK
AHNAK2
AHR
AHRR
AHSA2
AIDA
AIG1
AIMP1
AJUBA
AK2
AK4
AK5
AK9
AKAP1
AKAP10
AKAP12
AKAP13
AKAP5
AKAP6
AKAP9
AKIP1
AKIRIN1
AKIRIN2
AKR1B1
AKR1B10
AKR1E2
AKT1S1
AKT2
AKT3
ALCAM
ALDH16A1
ALDH18A1
ALDH1A1
ALDH1A2
ALDH1A3
ALDH1B1
ALDH1L1
ALDH1L2
ALDH3A2
ALDH3B1
ALDH3B2
ALDH4A1
ALDH6A1
ALDH7A1
ALDH8A1
ALDH9A1
ALDOA
ALDOB
ALG10
ALG12
ALG1L
ALG1L2
ALG3
ALG5
ALG9
ALK
ALKAL1
ALKAL2
ALKBH3
ALKBH4
ALKBH5
ALKBH6
ALKBH7
ALKBH8
ALOX12
ALOX5AP
ALOXE3
ALPK2
ALPL
ALS2
ALX4
AMBN
AMBRA1
AMD1
AMDHD1
AMER3
AMIGO2
AMIGO3
AMMECR1
AMN
AMOT
AMOTL1
AMOTL2
AMPD3
AMTN
AMZ1
AMZ2
ANAPC1
ANAPC13
ANAPC15
ANAPC16
ANAPC4
ANAPC7
ANG
ANGEL1
ANGPT2
ANGPT4
ANGPTL1
ANGPTL2
ANGPTL4
ANGPTL5
ANK1
ANK2
ANK3
ANKEF1
ANKH
ANKHD1
ANKHD1-EIF4EBP3
ANKIB1
ANKLE1
ANKMY2
ANKRD10
ANKRD11
ANKRD12
ANKRD13A
ANKRD13B
ANKRD13C
ANKRD17
ANKRD2
ANKRD20A1
ANKRD27
ANKRD28
ANKRD30B
ANKRD34B
ANKRD36B
ANKRD36C
ANKRD37
ANKRD39
ANKRD40
ANKRD44
ANKRD46
ANKRD49
ANKRD50
ANKRD53
ANKRD9
ANKZF1
ANLN
ANO1
ANO10
ANO2
ANO4
ANO6
ANTXR2
ANTXRL
ANXA1
ANXA10
ANXA11
ANXA2
ANXA2R
ANXA3
ANXA4
ANXA5
ANXA8
ANXA9
AOAH
AOX1
AP1AR
AP1M1
AP1S1
AP1S2
AP1S3
AP2A1
AP2B1
AP2S1
AP3B1
AP3D1
AP3M1
AP3M2
AP3S1
AP4B1
AP4E1
AP4M1
AP4S1
AP5M1
AP5S1
AP5Z1
APAF1
APBA2
APBA3
APBB1IP
APBB2
APC2
APCDD1
APEH
APEX1
APEX2
APH1B
API5
APIP
APLF
APLP1
APLP2
APOA1
APOA2
APOBEC1
APOBEC3A
APOBEC3F
APOBEC3G
APOBEC4
APOH
APOL1
APOL5
APOL6
APOLD1
APOM
APOO
APOPT1
APP
APPBP2
APPL2
APRT
APTX
AQP3
AQP7
AQP8
AQP9
AQR
AR
ARAF
ARAP3
ARCN1
AREG
ARF6
ARFGAP2
ARFGAP3
ARFIP1
ARG2
ARHGAP10
ARHGAP11B
ARHGAP12
ARHGAP17
ARHGAP18
ARHGAP19
ARHGAP20
ARHGAP21
ARHGAP24
ARHGAP25
ARHGAP26
ARHGAP27
ARHGAP29
ARHGAP30
ARHGAP32
ARHGAP35
ARHGAP42
ARHGAP44
ARHGAP5
ARHGEF10
ARHGEF10L
ARHGEF11
ARHGEF12
ARHGEF16
ARHGEF17
ARHGEF18
ARHGEF19
ARHGEF28
ARHGEF3
ARHGEF33
ARHGEF37
ARHGEF4
ARHGEF40
ARHGEF5
ARHGEF7
ARID1A
ARID1B
ARID2
ARID3A
ARID3B
ARID4B
ARID5A
ARID5B
ARIH2
ARIH2OS
ARL13B
ARL14
ARL17A
ARL17B
ARL2
ARL2BP
ARL2-SNX15
ARL3
ARL4A
ARL4C
ARL4D
ARL5A
ARL5B
ARL6IP1
ARL6IP5
ARL6IP6
ARL8B
ARL9
ARMC10
ARMC2
ARMC3
ARMC4
ARMC5
ARMC7
ARMT1
ARNT
ARNT2
ARNTL
ARPC4
ARPC4-TTLL3
ARPC5L
ARPIN
ARPP21
ARRB1
ARRB2
ARRDC1
ARRDC2
ARRDC3
ARSB
ARSJ
ARSK
ART1
ART5
ARTN
ARV1
ASAH1
ASAH2
ASAP1
ASAP2
ASAP3
ASB1
ASB13
ASB14
ASB15
ASB16
ASB2
ASB4
ASB5
ASB7
ASCC1
ASCL2
ASCL3
ASCL5
ASF1A
ASF1B
ASH2L
ASIC4
ASMT
ASMTL
ASNA1
ASNS
ASPG
ASPH
ASPM
ASPSCR1
ASXL1
ASXL3
ASZ1
ATAD1
ATAD3A
ATAD3B
ATAT1
ATF1
ATF2
ATF3
ATF5
ATF6
ATF7
ATF7IP
ATG10
ATG101
ATG12
ATG13
ATG14
ATG16L1
ATG3
ATG5
ATG7
ATG9A
ATG9B
ATIC
ATL2
ATL3
ATM
ATN1
ATOH7
ATOH8
ATOX1
ATP10D
ATP11A
ATP11B
ATP12A
ATP13A1
ATP13A3
ATP1A1
ATP1A3
ATP1B1
ATP1B3
ATP23
ATP2A1
ATP2B1
ATP2B2
ATP2B4
ATP2C2
ATP5E
ATP5EP2
ATP5G1
ATP5G2
ATP5H
ATP5J
ATP5L
ATP5O
ATP5S
ATP6AP1L
ATP6AP2
ATP6V0A1
ATP6V0D2
ATP6V0E1
ATP6V0E2
ATP6V1C1
ATP6V1E1
ATP6V1E2
ATP6V1G1
ATP6V1G3
ATP6V1H
ATP8A1
ATP8B1
ATP8B2
ATP8B3
ATP8B4
ATP9A
ATP9B
ATPAF2
ATPIF1
ATR
ATXN1
ATXN10
ATXN1L
ATXN2
ATXN2L
ATXN7L1
ATXN7L3
ATXN7L3B
AUH
AUNIP
AURKA
AURKB
AVL9
AVPI1
AVPR1A
AXIN1
AXIN2
AZIN1
AZIN2
B3GALNT2
B3GALT1
B3GALT2
B3GALT5
B3GAT1
B3GNT2
B3GNT3
B3GNT4
B3GNT5
B3GNT6
B3GNT9
B3GNTL1
B4GALNT2
B4GALNT3
B4GALT1
B4GALT5
B4GALT6
B9D1
B9D2
BAALC
BACE1
BACH1
BACH2
BAG1
BAG2
BAG5
BAG6
BAHCC1
BAHD1
BAIAP2
BAIAP2L1
BAIAP2L2
BAK1
BAMBI
BANF1
BANF2
BANK1
BANP
BAP1
BARHL2
BARX1
BARX2
BASP1
BAZ1A
BAZ1B
BAZ2A
BAZ2B
BBC3
BBIP1
BBS10
BBS12
BBS4
BBS9
BBX
BCAP29
BCAR1
BCAR3
BCAS1
BCAS3
BCAS4
BCCIP
BCKDHB
BCL10
BCL11B
BCL2
BCL2L1
BCL2L11
BCL2L12
BCL2L14
BCL2L15
BCL3
BCL6
BCL7A
BCL7C
BCL9
BCL9L
BCLAF1
BCO1
BCOR
BCR
BCS1L
BDH1
BDNF
BDP1
BEAN1
BEGAIN
BEND6
BEST2
BEST4
BET1
BEX4
BFAR
BFSP1
BFSP2
BHLHA15
BHLHA9
BHLHE40
BHLHE41
BHMT
BICC1
BICD1
BICDL1
BID
BIK
BIN1
BIRC3
BIRC5
BIRC7
BLID
BLM
BLNK
BLOC1S2
BLOC1S3
BLOC1S5
BLOC1S5-TXNDC5
BLVRA
BLVRB
BMF
BMI1
BMP2
BMP2K
BMP3
BMP4
BMP5
BMP6
BMP7
BMP8A
BMPER
BMPR1B
BMS1
BNIP1
BOC
BOD1
BOLA1
BOLA2
BOLA2B
BORCS5
BORCS6
BORCS7
BORCS8
BORCS8-MEF2B
BPHL
BPI
BPNT1
BPTF
BRAT1
BRCA2
BRD1
BRD2
BRD7
BRD9
BRI3
BRICD5
BRINP3
BRIP1
BRIX1
BRK1
BRMS1L
BROX
BRPF1
BRS3
BRSK1
BRWD3
BSCL2
BSG
BSPH1
BTAF1
BTBD10
BTBD11
BTBD16
BTBD2
BTBD3
BTBD6
BTBD7
BTBD9
BTC
BTD
BTF3L4
BTG1
BTG2
BTG3
BTN1A1
BTN2A1
BTN3A2
BTNL3
BTNL9
BTRC
BUB3
BUD23
BZW1
BZW2
C10orf10
C10orf105
C10orf62
C10orf76
C10orf88
C10orf90
C10orf95
C11orf1
C11orf49
C11orf52
C11orf54
C11orf58
C11orf63
C11orf68
C11orf74
C11orf80
C11orf87
C11orf91
C11orf95
C12orf29
C12orf40
C12orf43
C12orf49
C12orf50
C12orf57
C12orf65
C12orf66
C12orf73
C14orf105
C14orf119
C14orf180
C14orf2
C14orf37
C14orf39
C14orf80
C14orf93
C15orf38-AP3S2
C15orf39
C15orf62
C16orf45
C16orf46
C16orf54
C16orf59
C16orf70
C16orf72
C16orf87
C16orf89
C16orf92
C17orf67
C17orf78
C17orf99
C18orf32
C18orf54
C18orf8
C19orf25
C19orf33
C19orf68
C19orf73
C1GALT1
C1GALT1C1
C1orf105
C1orf116
C1orf123
C1orf131
C1orf174
C1orf185
C1orf198
C1orf61
C1QTNF1
C1QTNF3-AMACR
C1QTNF6
C1QTNF7
C1QTNF9
C1S
C2
C20orf24
C21orf91
C2CD2
C2CD2L
C2CD3
C2CD4A
C2CD4B
C2CD5
C2CD6
C2orf40
C2orf42
C2orf50
C2orf69
C2orf70
C2orf82
C3orf33
C3orf52
C3orf58
C3orf62
C4BPA
C4orf19
C4orf3
C4orf32
C4orf33
C4orf46
C5AR1
C5orf15
C5orf30
C6orf10
C6orf106
C6orf15
C6orf226
C6orf62
C7orf72
C7orf73
C8orf4
C8orf44
C8orf74
C9orf135
C9orf3
CA10
CA11
CA13
CA2
CA5A
CA6
CA8
CAB39
CAB39L
CABLES1
CABP2
CABP7
CABYR
CACFD1
CACHD1
CACNA1A
CACNA1C
CACNA1E
CACNA1I
CACNA2D1
CACNB2
CACNG2
CACNG4
CACNG5
CACNG6
CACNG8
CACUL1
CACYBP
CADM4
CADPS2
CAGE1
CALB1
CALB2
CALCB
CALCOCO1
CALCOCO2
CALCRL
CALHM2
CALM1
CALM2
CALM3
CALML3
CALN1
CAMK1D
CAMK1G
CAMK2D
CAMK2G
CAMK2N1
CAMK4
CAMKK1
CAMKK2
CAMLG
CAMSAP1
CAMSAP2
CAMTA1
CAND1
CAP1
CAP2
CAPN1
CAPN12
CAPN13
CAPN2
CAPN5
CAPN7
CAPN8
CAPN9
CAPNS1
CAPNS2
CAPRIN1
CAPRIN2
CAPS2
CAPZA2
CAPZA3
CAPZB
CARD11
CARD19
CARD8
CARF
CARM1
CARMIL1
CARMIL3
CARNMT1
CARNS1
CARTPT
CASC3
CASC4
CASP10
CASP4
CASP7
CASP9
CASQ2
CASS4
CAST
CASTOR1
CASTOR2
CASZ1
CAT
CATSPER3
CATSPERB
CATSPERE
CATSPERG
CAV1
CAV2
CAV3
CAVIN1
CAVIN2
CBL
CBLB
CBLC
CBLL1
CBLN1
CBR3
CBR4
CBSL
CBWD2
CBWD3
CBWD6
CBX1
CBX3
CBX4
CBX5
CBX6
CBX7
CBX8
CBY1
CC2D1B
CCAR1
CCAR2
CCBE1
CCDC107
CCDC110
CCDC112
CCDC114
CCDC115
CCDC117
CCDC125
CCDC130
CCDC141
CCDC146
CCDC148
CCDC15
CCDC150
CCDC151
CCDC167
CCDC170
CCDC182
CCDC184
CCDC28A
CCDC3
CCDC30
CCDC32
CCDC36
CCDC38
CCDC43
CCDC50
CCDC51
CCDC57
CCDC58
CCDC59
CCDC6
CCDC61
CCDC63
CCDC71L
CCDC81
CCDC85C
CCDC87
CCDC88B
CCDC9
CCDC90B
CCDC91
CCDC92
CCDC96
CCDC97
CCER1
CCK
CCKAR
CCL20
CCL22
CCM2
CCM2L
CCNB2
CCNC
CCND1
CCND3
CCNE1
CCNG1
CCNG2
CCNH
CCNI
CCNJ
CCNK
CCNL1
CCNT1
CCNT2
CCNY
CCNYL1
CCPG1
CCR1
CCR7
CCR9
CCS
CCSER2
CCT2
CCT3
CCT8L2
CCZ1B
CD109
CD160
CD163
CD164
CD180
CD22
CD226
CD247
CD248
CD276
CD28
CD2AP
CD2BP2
CD300A
CD300LG
CD320
CD36
CD38
CD3E
CD3EAP
CD40
CD44
CD46
CD47
CD53
CD55
CD58
CD59
CD82
CD83
CD9
CD93
CD96
CDA
CDADC1
CDC14A
CDC14B
CDC16
CDC20
CDC25A
CDC25B
CDC26
CDC27
CDC34
CDC40
CDC42
CDC42BPA
CDC42BPB
CDC42BPG
CDC42EP2
CDC42EP3
CDC42EP4
CDC42EP5
CDC42SE1
CDC45
CDC5L
CDC6
CDC7
CDC73
CDCA2
CDCA3
CDCA4
CDCA7
CDCA7L
CDCP1
CDH1
CDH15
CDH17
CDH2
CDH24
CDH3
CDH5
CDHR2
CDHR3
CDHR4
CDIPT
CDK1
CDK10
CDK11B
CDK12
CDK13
CDK16
CDK17
CDK18
CDK19
CDK2
CDK20
CDK2AP2
CDK5
CDK5R1
CDK5R2
CDK5RAP1
CDK5RAP3
CDK6
CDK7
CDK8
CDK9
CDKAL1
CDKL1
CDKL2
CDKL3
CDKN1B
CDKN1C
CDKN2A
CDKN2AIP
CDKN2AIPNL
CDKN2B
CDKN2C
CDKN3
CDNF
CDO1
CDON
CDR2
CDRT1
CDRT15L2
CDS1
CDS2
CDT1
CDV3
CDX2
CDYL
CEACAM1
CEACAM16
CEACAM19
CEACAM21
CEACAM3
CEACAM6
CEBPB
CEBPD
CEBPG
CECR2
CELA3A
CELF1
CELF3
CELF5
CELSR1
CELSR2
CELSR3
CEMIP
CEMP1
CENPA
CENPBD1
CENPC
CENPE
CENPF
CENPH
CENPJ
CENPL
CENPM
CENPN
CENPO
CENPP
CENPU
CENPV
CENPVL1
CENPVL2
CENPVL3
CENPW
CENPX
CEP112
CEP120
CEP128
CEP131
CEP135
CEP152
CEP162
CEP164
CEP170
CEP250
CEP290
CEP295NL
CEP41
CEP44
CEP55
CEP57
CEP57L1
CEP68
CEP70
CEP76
CEP78
CEP83
CEP89
CEP95
CEP97
CERK
CERS2
CERS4
CERS5
CERS6
CES3
CES4A
CETN3
CFAP126
CFAP157
CFAP20
CFAP206
CFAP221
CFAP43
CFAP44
CFAP45
CFAP61
CFAP73
CFAP74
CFDP1
CFL1
CFL2
CFLAR
CGGBP1
CGN
CGRRF1
CH25H
CHAC2
CHAF1B
CHCHD5
CHCHD7
CHD1
CHD1L
CHD2
CHD3
CHD4
CHD5
CHD7
CHD8
CHD9
CHEK1
CHEK2
CHGA
CHGB
CHIC1
CHIC2
CHID1
CHKA
CHMP1B
CHMP3
CHMP4A
CHMP4B
CHMP4C
CHMP5
CHMP6
CHMP7
CHN1
CHP1
CHRAC1
CHRD
CHRM1
CHRM4
CHRNA1
CHRNA2
CHRNA5
CHRNA6
CHRNA9
CHRNB1
CHST11
CHST12
CHST14
CHST15
CHST2
CHST3
CHST4
CHST6
CHSY1
CHSY3
CIB3
CIC
CIDEC
CIPC
CIR1
CIRBP
CISD1
CISD2
CISH
CIT
CITED2
CITED4
CIZ1
CKAP2
CKAP2L
CKAP4
CKMT1A
CKMT1B
CKMT2
CKS1B
CKS2
CLASP1
CLASP2
CLCF1
CLCN2
CLCN3
CLCN4
CLCN6
CLDN10
CLDN11
CLDN14
CLDN20
CLDN22
CLDN23
CLDN3
CLDN34
CLDN4
CLDN5
CLDN6
CLDN9
CLDND1
CLDND2
CLEC10A
CLEC16A
CLEC18A
CLEC18B
CLEC19A
CLEC20A
CLEC2L
CLEC3B
CLEC4M
CLEC6A
CLGN
CLHC1
CLIC1
CLIC4
CLIC5
CLIC6
CLINT1
CLIP1
CLIP2
CLIP4
CLK2
CLK3
CLMN
CLMP
CLN6
CLNK
CLOCK
CLPB
CLPSL1
CLPSL2
CLPX
CLRN2
CLSTN1
CLTA
CLTC
CLU
CLUH
CLVS1
CLYBL
CMBL
CMC2
CMIP
CMPK1
CMPK2
CMSS1
CMTM3
CMTM4
CMTM6
CMTM7
CMTM8
CMTR2
CNBD2
CNBP
CNFN
CNGA4
CNGB1
CNGB3
CNIH3
CNKSR1
CNKSR3
CNMD
CNN2
CNN3
CNNM2
CNOT10
CNOT11
CNOT2
CNOT3
CNOT6L
CNOT8
CNP
CNPY2
CNPY3
CNPY4
CNST
CNTN3
CNTNAP1
CNTNAP3
CNTNAP3B
CNTRL
COA1
COA4
COA6
COBL
COCH
COG2
COG3
COG4
COG6
COG7
COL12A1
COL13A1
COL14A1
COL16A1
COL17A1
COL18A1
COL1A1
COL1A2
COL21A1
COL22A1
COL24A1
COL26A1
COL27A1
COL28A1
COL3A1
COL4A1
COL4A2
COL4A4
COL5A1
COL5A2
COL6A2
COL6A3
COL6A5
COL8A1
COL9A1
COL9A2
COL9A3
COLEC10
COLEC12
COLGALT2
COMMD10
COMMD3
COMMD3-BMI1
COMMD6
COMMD9
COMTD1
COPB1
COPB2
COPG1
COPG2
COPRS
COPS4
COPS5
COPS7A
COPS7B
COPS8
COPZ1
COPZ2
COQ10A
COQ2
COQ4
COQ5
COQ6
COQ7
COQ8A
COQ8B
CORIN
CORO1C
CORO6
COTL1
COX11
COX14
COX15
COX17
COX19
COX20
COX4I2
COX5A
COX6A1
COX6B1
COX6C
COX7A1
COX7A2L
COX7C
CP
CPA4
CPD
CPE
CPEB2
CPEB3
CPEB4
CPED1
CPLX2
CPN1
CPN2
CPNE2
CPNE3
CPNE4
CPNE7
CPNE8
CPO
CPOX
CPPED1
CPSF1
CPSF4L
CPVL
CPXM1
CRABP2
CRADD
CRAT
CRB2
CRB3
CRCP
CREB1
CREB3
CREB3L1
CREB3L2
CREB3L4
CREB5
CREBBP
CREBRF
CREG2
CRELD1
CRELD2
CREM
CRH
CRIM1
CRIP1
CRIP2
CRISP1
CRISPLD2
CRK
CRLF2
CRLF3
CRLS1
CROCC
CRTAM
CRTAP
CRTC2
CRTC3
CRY1
CRY2
CRYBA1
CRYBA4
CRYBB2
CRYBB3
CRYBG1
CRYGS
CRYL1
CRYZL1
CS
CSF1R
CSF2RB
CSGALNACT1
CSGALNACT2
CSH2
CSNK1A1
CSNK1E
CSNK1G1
CSNK1G3
CSNK2A3
CSPG4
CSPP1
CSRNP1
CSRP2
CSRP3
CST3
CST7
CST9
CSTF1
CSTF3
CTAGE1
CTAGE15
CTAGE4
CTAGE5
CTAGE6
CTAGE8
CTBP2
CTBS
CTC1
CTCF
CTCFL
CTDNEP1
CTDP1
CTDSP2
CTDSPL
CTDSPL2
CTF1
CTGF
CTH
CTHRC1
CTIF
CTNNA1
CTNNA3
CTNNAL1
CTNNB1
CTNNBIP1
CTNND1
CTNS
CTPS1
CTR9
CTRB1
CTSB
CTSC
CTSE
CTSH
CTSO
CTSV
CTTN
CTTNBP2NL
CTU1
CTU2
CTXN3
CUBN
CUEDC2
CUL1
CUL2
CUL3
CUL4A
CUL4B
CUL9
CUTA
CUTC
CUX1
CUX2
CWC15
CWC22
CWC27
CWF19L2
CWH43
CXADR
CXCL13
CXCL17
CXCL2
CXCL3
CXCL8
CXCR4
CXCR5
CXCR6
CXorf36
CXorf57
CXXC1
CXXC4
CXXC5
CYB561
CYB561D1
CYB5B
CYB5D1
CYB5D2
CYCS
CYLD
CYP11A1
CYP1A1
CYP1B1
CYP20A1
CYP24A1
CYP26A1
CYP26B1
CYP26C1
CYP2A6
CYP2A7
CYP2B6
CYP2F1
CYP2J2
CYP2R1
CYP2S1
CYP2U1
CYP39A1
CYP3A5
CYP3A7-CYP3A51P
CYP4F12
CYP4F2
CYP51A1
CYR61
CYS1
CYSLTR2
CYSTM1
CYTH1
CYTH2
CYTH4
DAAM1
DAB2
DAB2IP
DACH1
DACT1
DACT3
DAD1
DAG1
DAGLA
DAGLB
DAOA
DAP
DAP3
DAPK2
DAPL1
DARS
DARS2
DAW1
DAXX
DAZAP2
DBF4
DBI
DBNDD1
DBNL
DBP
DBX1
DBX2
DCAF1
DCAF11
DCAF13
DCAF4
DCAF6
DCAF8
DCAKD
DCANP1
DCBLD1
DCBLD2
DCD
DCHS2
DCK
DCLK1
DCLK2
DCLRE1B
DCLRE1C
DCN
DCP2
DCPS
DCST2
DCT
DCTN6
DCTPP1
DCUN1D3
DCUN1D4
DCUN1D5
DCXR
DDA1
DDAH1
DDB2
DDC
DDHD1
DDI1
DDIAS
DDIT3
DDIT4
DDIT4L
DDOST
DDR1
DDR2
DDRGK1
DDX10
DDX11
DDX17
DDX19A
DDX19B
DDX20
DDX21
DDX24
DDX31
DDX39A
DDX39B
DDX3X
DDX43
DDX47
DDX5
DDX58
DDX59
DDX6
DDX60
DDX60L
DECR1
DEDD
DEDD2
DEFA6
DEFB1
DEFB115
DEFB130A
DEFB131A
DEGS1
DEGS2
DEK
DENND1A
DENND1B
DENND2A
DENND2C
DENND3
DENND4A
DENND4C
DENND5A
DENND5B
DENND6A
DEPDC1
DEPDC1B
DEPDC4
DEPDC5
DEPTOR
DERL1
DESI2
DET1
DFNA5
DFNB59
DGAT1
DGCR6
DGCR6L
DGKA
DGKB
DGKD
DGKG
DGKH
DGKI
DHCR24
DHDH
DHFR
DHPS
DHRS2
DHRS3
DHRS4
DHRS4L2
DHRS7
DHRS7B
DHRS9
DHTKD1
DHX15
DHX16
DHX30
DHX32
DHX36
DHX37
DHX38
DHX40
DHX8
DIABLO
DIAPH1
DIAPH3
DICER1
DIDO1
DIEXF
DIMT1
DIO3
DIP2B
DIP2C
DIRAS2
DIRAS3
DIRC2
DIS3L
[truncated: 6,894 more rows]

## Sheet: ICEBERG_Peaks_H3K4me3
Chr	Start	End
chr1	27472	30349
chr1	198051	200924
chr1	777314	780597
chr1	825801	828945
chr1	903957	904729
chr1	923907	926404
chr1	940358	941057
chr1	941565	942443
chr1	957848	962019
chr1	965787	967776
chr1	975866	976722
chr1	998325	1002529
chr1	1006243	1006895
chr1	1012515	1015673
chr1	1019281	1021861
chr1	1058168	1060889
chr1	1063771	1064452
chr1	1068205	1070140
chr1	1073320	1074506
chr1	1079102	1080512
chr1	1114819	1117038
chr1	1157504	1158732
chr1	1162394	1165579
chr1	1201464	1201857
chr1	1205249	1207429
chr1	1207737	1208427
chr1	1230427	1232928
chr1	1272135	1274866
chr1	1304590	1310517
chr1	1318368	1318738
chr1	1323320	1323823
chr1	1324092	1326119
chr1	1344167	1346253
chr1	1346915	1349970
chr1	1351307	1351899
chr1	1373518	1377015
chr1	1397717	1401229
chr1	1401947	1402416
chr1	1405728	1408949
chr1	1433119	1437155
chr1	1470511	1473817
chr1	1474758	1475161
chr1	1504895	1506046
chr1	1510890	1513669
chr1	1573078	1576449
chr1	1599669	1601042
chr1	1614061	1617449
chr1	1626706	1629897
chr1	1657648	1660360
chr1	1686262	1686981
chr1	1691152	1694346
chr1	1722988	1725628
chr1	1744286	1747498
chr1	1776934	1779643
chr1	1888679	1892587
chr1	1896855	1897212
chr1	1907970	1910426
chr1	1918074	1919958
chr1	1944189	1944443
chr1	1959547	1960165
chr1	2002837	2004091
chr1	2019397	2020030
chr1	2049360	2052028
chr1	2139941	2140240
chr1	2189399	2190158
chr1	2193593	2195590
chr1	2199253	2200390
chr1	2212455	2213170
chr1	2226412	2231155
chr1	2314131	2315239
chr1	2389811	2393235
chr1	2411371	2414768
chr1	2467171	2467740
chr1	2524910	2527048
chr1	2545604	2549165
chr1	2584988	2588095
chr1	2610731	2611632
chr1	2641374	2643569
chr1	3068676	3070786
chr1	3453419	3453800
chr1	3454095	3455865
chr1	3530365	3531656
chr1	3610236	3612274
chr1	3623798	3626564
chr1	3648776	3650406
chr1	3651890	3654050
chr1	3771696	3773670
chr1	3794478	3797674
chr1	3855201	3858688
chr1	3898716	3901846
chr1	5990683	5994226
chr1	6024983	6026720
chr1	6179166	6180306
chr1	6197432	6200706
chr1	6204714	6207657
chr1	6220228	6220578
chr1	6234418	6236842
chr1	6245327	6245879
chr1	6249255	6250224
chr1	6259737	6261555
chr1	6385582	6387297
chr1	6391754	6394562
chr1	6419218	6420882
chr1	6423182	6427014
chr1	6427793	6428153
chr1	6439953	6440425
chr1	6446701	6449832
chr1	6471062	6471936
chr1	6489144	6492406
chr1	6496340	6498328
chr1	6552642	6554890
chr1	6579603	6581432
chr1	6600262	6604508
chr1	6612146	6616171
chr1	6624423	6626440
chr1	6699950	6702100
chr1	6783430	6787002
chr1	7266312	7266692
chr1	7549029	7550577
chr1	7703372	7706086
chr1	7770942	7772514
chr1	7783873	7784161
chr1	7912594	7913529
chr1	7953436	7955207
chr1	7960161	7963202
chr1	8021462	8029073
chr1	8166007	8166371
chr1	8202095	8202744
chr1	8317677	8319412
chr1	8422172	8425064
chr1	8525229	8526096
chr1	8701840	8704225
chr1	8815529	8818746
chr1	8873726	8874452
chr1	8874872	8880189
chr1	8889852	8890810
chr1	9127353	9129277
chr1	9163580	9164014
chr1	9180639	9183216
chr1	9234174	9236116
chr1	9292611	9295105
chr1	9428375	9430028
chr1	9539016	9541563
chr1	9588313	9590545
chr1	9626730	9627143
chr1	9651361	9652089
chr1	9686563	9690561
chr1	9821930	9824202
chr1	9825028	9825768
chr1	9893061	9893352
chr1	9908883	9911350
chr1	9941973	9944715
chr1	9996577	9998535
chr1	10032388	10034959
chr1	10209532	10212716
chr1	10398180	10400688
chr1	10429886	10431703
chr1	10471236	10473134
chr1	10474392	10476679
chr1	10693589	10695107
chr1	10779475	10779769
chr1	10793152	10796951
chr1	10804141	10804805
chr1	10900663	10901343
chr1	11011716	11014222
chr1	11058179	11061442
chr1	11098459	11100262
chr1	11261247	11264152
chr1	11273111	11274463
chr1	11478776	11480114
chr1	11650587	11650834
chr1	11652707	11656129
chr1	11663942	11665526
chr1	11679819	11682040
chr1	11690199	11691938
chr1	11735808	11737469
chr1	11803324	11803643
chr1	11804555	11807203
chr1	11908491	11909755
chr1	11924399	11926955
chr1	11933957	11935895
chr1	11979898	11982147
chr1	12018311	12020719
chr1	12080780	12082417
chr1	12229699	12232373
chr1	12540176	12540480
chr1	12549648	12550026
chr1	12615578	12620256
chr1	13699937	13701473
chr1	13748694	13751264
chr1	13759010	13759554
chr1	13829059	13829749
chr1	14923720	14925740
chr1	15152112	15155095
chr1	15173605	15174455
chr1	15179066	15179511
chr1	15200285	15201002
chr1	15236091	15236955
chr1	15246989	15247822
chr1	15261008	15261631
chr1	15409464	15411707
chr1	15523144	15528511
chr1	15616788	15619259
chr1	15683915	15686010
chr1	15796658	15797122
chr1	15799903	15800815
chr1	15833033	15836679
chr1	15846765	15851118
chr1	15886046	15886439
chr1	15974747	15976557
chr1	16012706	16013373
chr1	16048705	16049338
chr1	16072624	16074099
chr1	16144166	16144513
chr1	16145394	16147307
chr1	16152798	16157818
chr1	16167087	16168261
chr1	16175889	16176340
chr1	16205851	16209013
chr1	16211510	16213221
chr1	16216414	16217608
chr1	16236080	16238274
chr1	16350625	16353526
chr1	16366628	16369025
chr1	16440290	16441958
chr1	16497804	16500180
chr1	16514258	16515446
chr1	16611653	16612629
chr1	16642934	16645827
chr1	16647699	16648352
chr1	16656316	16657991
chr1	16665290	16668161
chr1	16699955	16702252
chr1	16707548	16708514
chr1	16739263	16742140
chr1	16749512	16750943
chr1	16758994	16759360
chr1	16872729	16873595
chr1	16894921	16896780
chr1	16903693	16905095
chr1	16905401	16905758
chr1	16913486	16915559
chr1	16960442	16961624
chr1	16978853	16981255
chr1	17010429	17012310
chr1	17052480	17054489
chr1	17347947	17348578
chr1	17437017	17440796
chr1	17539277	17541611
chr1	18901450	18903774
chr1	18926564	18928039
chr1	18954930	18957140
chr1	19208504	19212052
chr1	19250012	19253900
chr1	19310683	19313593
chr1	19483883	19487352
chr1	19595841	19598818
chr1	19642944	19646737
chr1	19664607	19665470
chr1	19798945	19800763
chr1	19882014	19883980
chr1	20476194	20476813
chr1	20484164	20487539
chr1	20506914	20509046
chr1	20588495	20590213
chr1	20633331	20635084
chr1	20659863	20662871
chr1	20696392	20697434
chr1	20731298	20733650
chr1	20784717	20788416
chr1	21175015	21177119
chr1	21289563	21291038
chr1	21324275	21324690
chr1	21343944	21346694
chr1	21428057	21428823
chr1	21439487	21441846
chr1	21621892	21622907
chr1	21638847	21639084
chr1	21651238	21651889
chr1	21659350	21659840
chr1	21781110	21784091
chr1	21935824	21937770
chr1	22022751	22023111
chr1	22024099	22027018
chr1	22052212	22054603
chr1	22142234	22143991
chr1	22428587	22429945
chr1	22451525	22453491
chr1	22710006	22712143
chr1	23018351	23021686
chr1	23166937	23170026
chr1	23177588	23178138
chr1	23216356	23217936
chr1	23341922	23345456
chr1	23367076	23371184
chr1	23377095	23377528
chr1	23403617	23404364
chr1	23483036	23484985
chr1	23528142	23532300
chr1	23554416	23560034
chr1	23562154	23562512
chr1	23635195	23635568
chr1	23691319	23693534
chr1	23742212	23745770
chr1	23776981	23780049
chr1	23789771	23792762
chr1	23798831	23801883
chr1	23824265	23826055
chr1	23866899	23868523
chr1	23958249	23961701
chr1	23978071	23981535
chr1	24107430	24109808
chr1	24142072	24143505
chr1	24150031	24150816
chr1	24186208	24187998
chr1	24321529	24322698
chr1	24412625	24414093
chr1	24415441	24417140
chr1	24501425	24504226
chr1	24555452	24556301
chr1	24641638	24645494
chr1	24684125	24684507
chr1	24724395	24725238
chr1	24744816	24747074
chr1	24848168	24848675
chr1	24928276	24931037
chr1	25231366	25233707
chr1	25239322	25241510
chr1	25245717	25248506
chr1	25266214	25268204
chr1	25336445	25339960
chr1	25429293	25432590
chr1	25506610	25507092
chr1	25543290	25545212
chr1	25568682	25569070
chr1	25615661	25617168
chr1	25799790	25801365
chr1	25818125	25821464
chr1	25858120	25860285
chr1	25861026	25861679
chr1	25874321	25876615
chr1	25889765	25890114
chr1	25892430	25892903
chr1	25904541	25906609
chr1	25996689	25998467
chr1	26034385	26036760
chr1	26110143	26113096
chr1	26141066	26141409
chr1	26145003	26145539
chr1	26161946	26162337
chr1	26169589	26171236
chr1	26177028	26178772
chr1	26233612	26236312
chr1	26237607	26237879
chr1	26275760	26276047
chr1	26279300	26281056
chr1	26305329	26307451
chr1	26335286	26336837
chr1	26353871	26354161
chr1	26431752	26433463
chr1	26471592	26474206
chr1	26500135	26502055
chr1	26529125	26531796
chr1	26619704	26622111
chr1	26636453	26637459
chr1	26692065	26698791
chr1	26786716	26789588
chr1	26826218	26828132
chr1	26862104	26866279
chr1	26888988	26890888
chr1	26899135	26901266
chr1	26921205	26923347
chr1	26958620	26961860
chr1	26990640	26991699
chr1	26992295	26996490
chr1	26997386	26998145
chr1	27011409	27013947
chr1	27154278	27155494
chr1	27234157	27236077
chr1	27321584	27324069
chr1	27340745	27344059
chr1	27349146	27349500
chr1	27365332	27367482
chr1	27382672	27383370
chr1	27391496	27394037
chr1	27487752	27491286
chr1	27500113	27500441
chr1	27527265	27529149
chr1	27542708	27543224
chr1	27556944	27557324
chr1	27602014	27605052
chr1	27658881	27660597
chr1	27671615	27672779
chr1	27725722	27727429
chr1	27772985	27774727
chr1	27829838	27832538
chr1	27872398	27873564
chr1	27874945	27875284
chr1	27913430	27914789
chr1	27934596	27935483
chr1	27959408	27961973
chr1	28086654	28089606
chr1	28231441	28233478
chr1	28235065	28237651
chr1	28246011	28247432
chr1	28248271	28249756
chr1	28258954	28261318
chr1	28327804	28330513
chr1	28351084	28352817
chr1	28369201	28371284
chr1	28500921	28501378
chr1	28504257	28509017
chr1	28517645	28520086
chr1	28552256	28554428
chr1	28577337	28577729
chr1	28579513	28583382
chr1	28641583	28644799
chr1	28647716	28648513
chr1	28648898	28649353
chr1	28667698	28670269
chr1	28721261	28722005
chr1	28736008	28738899
chr1	28886799	28888587
chr1	28914204	28915688
chr1	29121303	29124813
chr1	29179719	29182718
chr1	29229649	29231263
chr1	29236388	29239271
chr1	30684910	30685428
chr1	30718242	30719618
chr1	30824040	30824457
chr1	30907331	30910215
chr1	31063252	31066302
chr1	31154315	31156136
chr1	31239180	31240116
chr1	31295219	31298313
chr1	31412662	31415115
chr1	31549113	31549812
chr1	31573979	31574532
chr1	31574917	31578159
chr1	31588784	31589411
chr1	31643212	31646306
chr1	31714524	31716008
chr1	31762312	31764870
chr1	31787913	31789363
chr1	31815439	31816001
chr1	31934483	31939074
chr1	31939337	31940241
chr1	31944107	31945075
chr1	32012815	32016088
chr1	32071990	32074166
chr1	32107067	32109765
chr1	32178845	32181162
chr1	32200397	32200981
chr1	32205371	32206749
chr1	32220789	32224218
chr1	32239990	32242069
chr1	32291139	32293543
chr1	32334404	32336541
chr1	32351224	32352928
chr1	32393278	32396122
chr1	32447496	32449559
chr1	32464934	32465658
chr1	32499712	32501213
chr1	32520643	32520936
chr1	32538732	32541091
chr1	32611874	32612703
chr1	32649122	32653130
chr1	32702036	32703550
chr1	32716502	32717390
chr1	32724894	32725494
chr1	32740805	32743857
chr1	32758981	32761714
chr1	32814596	32819632
chr1	32893094	32893893
chr1	32900004	32902050
chr1	32962064	32965557
chr1	33035390	33037389
chr1	33080313	33082186
chr1	33125905	33128614
chr1	33180460	33182509
chr1	33255334	33257819
chr1	33346607	33351369
chr1	33427969	33431571
chr1	33433380	33433797
chr1	33436736	33437321
chr1	33472023	33473842
chr1	34754992	34755672
chr1	34780423	34783687
chr1	34857924	34860314
chr1	34984013	34986391
chr1	35030157	35032746
chr1	35078767	35080828
chr1	35190448	35194503
chr1	35268064	35270317
chr1	35555990	35559043
chr1	35572888	35575044
chr1	35637110	35638249
chr1	35639339	35643125
chr1	35717524	35719458
chr1	35767836	35770409
chr1	35807568	35809866
chr1	35882894	35884631
chr1	35929782	35933194
chr1	36088580	36090521
chr1	36148092	36150062
chr1	36150584	36151288
chr1	36155063	36158038
chr1	36160569	36161698
chr1	36223149	36226096
chr1	36306253	36307748
chr1	36320981	36324313
chr1	36373556	36375179
chr1	36384370	36387263
chr1	36396251	36398568
chr1	36400359	36402231
chr1	36449695	36451316
chr1	36462729	36465353
chr1	37394946	37395281
chr1	37471239	37472417
chr1	37473572	37477496
chr1	37479180	37480174
chr1	37513468	37515438
chr1	37552601	37554397
chr1	37594139	37596526
chr1	37634486	37634816
chr1	37689177	37693699
chr1	37752101	37753437
chr1	37793469	37795523
chr1	37806338	37809628
chr1	37811181	37811587
chr1	37858233	37860864
chr1	37930219	37932570
chr1	37945942	37947328
chr1	37988225	37990656
chr1	37999678	38001935
chr1	38004024	38005971
chr1	38011401	38014407
chr1	38046877	38047473
chr1	38858397	38860878
chr1	38871996	38874750
chr1	38990363	38993270
chr1	39025592	39027983
chr1	39081113	39081773
chr1	39102434	39103301
chr1	39104608	39107307
chr1	39116671	39117239
chr1	39192426	39192834
chr1	39394559	39395591
chr1	39398267	39398891
chr1	39407788	39410130
chr1	39490859	39492020
chr1	39558374	39560316
chr1	39574608	39577466
chr1	39606089	39606635
chr1	39638484	39640143
chr1	39657772	39658179
chr1	39690914	39691542
chr1	39738410	39740475
chr1	39787651	39790161
chr1	39799442	39799784
chr1	39881697	39884131
chr1	39900640	39902893
chr1	39954781	39956561
chr1	40039063	40042547
chr1	40096125	40097843
chr1	40107338	40107641
chr1	40152990	40153270
chr1	40160799	40163486
chr1	40256341	40259554
chr1	40315588	40317112
chr1	40373237	40375479
chr1	40530624	40533289
chr1	40664578	40666440
chr1	40690440	40693448
chr1	40708618	40710614
chr1	40711091	40711469
chr1	40783441	40784825
chr1	40862034	40862682
chr1	40978619	40981614
chr1	41240334	41243034
chr1	41360930	41362649
chr1	41380919	41383237
chr1	41423736	41424150
chr1	41495357	41496321
chr1	41661218	41663048
chr1	41917337	41919219
chr1	41920380	41920665
chr1	42034505	42036822
chr1	42333216	42336714
chr1	42380126	42381713
chr1	42455653	42457741
chr1	42462555	42463852
chr1	42657346	42660043
chr1	42680518	42684867
chr1	42765586	42768692
chr1	42816162	42817870
chr1	42845379	42847940
chr1	42923172	42925678
chr1	42941856	42942170
chr1	42956442	42960312
chr1	43171061	43172521
chr1	43269970	43271685
chr1	43284738	43286249
chr1	43347874	43349848
chr1	43357710	43360582
chr1	43365760	43370025
chr1	43372649	43372963
chr1	43388436	43391131
chr1	43452871	43454665
chr1	43530405	43532694
chr1	43549887	43550710
chr1	43648700	43652445
chr1	43706277	43708867
chr1	43932925	43935351
chr1	43945458	43948267
chr1	43969575	43971260
chr1	43973999	43976512
chr1	43978397	43980726
chr1	43991155	43993024
chr1	44029321	44032165
chr1	44212825	44214636
chr1	44354070	44356093
chr1	44404601	44406534
chr1	44545885	44546366
chr1	44630978	44633388
chr1	44673268	44675484
chr1	44731214	44732073
chr1	44738974	44741191
chr1	44774440	44777416
chr1	44777648	44778039
chr1	44786031	44786659
chr1	44799908	44801521
chr1	44808135	44808740
chr1	44820272	44820617
chr1	44985123	44986881
chr1	45009854	45013523
chr1	45205352	45207492
chr1	45302665	45305158
chr1	45338708	45341961
chr1	45490241	45491821
chr1	45498879	45501819
chr1	45520231	45523749
chr1	45549921	45552149
chr1	45583035	45586017
chr1	45684716	45689669
chr1	45749644	45751692
chr1	45802697	45805211
chr1	46062593	46063323
chr1	46132736	46133607
chr1	46197348	46200054
chr1	46220570	46220934
chr1	46246653	46249084
chr1	46300797	46305632
chr1	46338978	46342240
chr1	46394204	46395433
chr1	46401815	46402237
chr1	46442548	46443703
chr1	46489091	46490345
chr1	46603217	46605178
chr1	46615656	46617387
chr1	46666796	46668820
chr1	46717458	46720005
chr1	47178808	47179837
chr1	47312184	47315257
chr1	47332917	47335642
chr1	47435990	47438805
chr1	47709401	47710099
chr1	47997383	47997749
chr1	48470922	48472974
chr1	50333202	50333675
chr1	50958607	50961425
chr1	50967373	50970633
chr1	50977594	50979110
chr1	51235473	51238194
chr1	51329707	51331803
chr1	51344555	51345323
chr1	51517153	51519357
chr1	51616628	51618427
chr1	51622239	51622716
chr1	51728636	51731008
chr1	51877214	51880035
chr1	51989645	51989936
chr1	51990281	51991035
chr1	52032318	52034406
chr1	52053624	52058156
chr1	52141040	52143743
chr1	52364634	52366763
chr1	52368322	52368928
chr1	52402691	52405917
chr1	52551276	52554552
chr1	52697053	52699022
chr1	52702892	52703310
chr1	52725899	52728128
chr1	52921086	52922274
chr1	52926984	52928372
chr1	53014317	53016288
chr1	53196331	53198680
chr1	53219258	53221611
chr1	53237015	53239616
chr1	53325518	53328630
chr1	53739155	53739794
chr1	53836659	53839069
chr1	53888403	53890459
chr1	53944068	53947779
chr1	53956834	53957072
chr1	54051404	54054697
chr1	54121562	54121999
chr1	54198835	54201622
chr1	54404868	54408381
chr1	54487937	54489538
chr1	54499062	54500322
chr1	54541672	54543413
chr1	54563990	54565509
chr1	54715569	54717388
chr1	54762949	54765178
chr1	54885626	54888181
chr1	54980093	54981493
chr1	55038859	55041140
chr1	55213153	55216837
chr1	56577760	56580184
chr1	56644269	56646774
chr1	58545201	58547342
chr1	58577932	58578234
chr1	58584150	58584653
chr1	58698482	58700316
chr1	58782912	58786132
chr1	58814044	58817025
chr1	58903275	58904520
chr1	59146540	59147339
chr1	59295707	59298267
chr1	59814121	59816185
chr1	59926275	59927206
chr1	61042756	61043093
chr1	61049662	61050894
chr1	61053640	61054050
chr1	61056510	61058342
chr1	61076407	61078451
chr1	61079644	61080669
chr1	61081088	61084980
chr1	61723309	61726280
chr1	61741026	61744354
chr1	62121975	62122798
chr1	62435050	62439456
chr1	62686959	62690080
chr1	62746460	62746744
chr1	62783739	62785736
chr1	63316851	63318105
chr1	63322039	63322527
chr1	63366726	63368832
chr1	63521574	63525098
chr1	63592810	63595167
chr1	63773671	63775190
chr1	64344060	64344395
chr1	64469694	64472211
chr1	64505151	64505564
chr1	64505935	64506182
chr1	64743755	64746751
chr1	64964755	64967178
chr1	65002124	65003721
chr1	65065711	65069275
chr1	65146646	65149941
chr1	65253787	65255742
chr1	65419618	65422605
chr1	66300645	66301779
chr1	66330310	66335338
chr1	66923188	66927117
chr1	66929526	66932245
chr1	67052268	67054849
chr1	67427907	67431747
chr1	67684535	67687538
chr1	67699276	67700851
chr1	67736230	67736589
chr1	67748862	67750560
chr1	67831252	67834083
chr1	68049912	68050862
chr1	68231428	68233431
chr1	68383456	68384441
chr1	68384714	68389914
chr1	68494887	68497905
chr1	70133177	70133630
chr1	70204047	70207479
chr1	70220533	70223579
chr1	70352740	70355673
chr1	70409863	70412518
chr1	71078927	71082477
chr1	74197368	74199524
chr1	74731475	74734751
chr1	75374817	75376317
chr1	75614656	75615340
chr1	75723271	75726227
chr1	75784198	75788909
chr1	76074619	76075426
chr1	77005009	77006051
chr1	77217973	77220793
chr1	77680699	77684749
chr1	77757915	77760461
chr1	77779244	77781317
chr1	77977154	77981117
chr1	78003188	78006428
chr1	78105811	78106392
chr1	83064409	83065174
chr1	83997758	84000250
chr1	84076338	84079751
chr1	84144494	84144823
chr1	84160353	84160742
chr1	84173173	84173949
chr1	84174182	84174754
chr1	84175264	84175581
chr1	84298007	84300177
chr1	84301283	84304421
chr1	84348026	84348811
chr1	84433464	84433708
chr1	84478675	84481122
chr1	84503553	84507779
chr1	84572771	84575649
chr1	84603585	84604453
chr1	84619679	84621305
chr1	84688561	84691806
chr1	84891908	84894041
chr1	84944892	84945368
chr1	84996102	84998065
chr1	85047424	85049799
chr1	85061679	85062884
chr1	85199724	85202508
chr1	85258165	85259851
chr1	85275008	85277180
chr1	85298016	85298329
chr1	85463699	85465918
chr1	85576013	85577679
chr1	85580627	85581918
chr1	85628960	85629338
chr1	85706687	85709312
chr1	86394797	86396957
chr1	86704098	86706572
chr1	86912261	86916656
chr1	87327530	87332413
chr1	87334443	87336069
chr1	88462315	88463176
chr1	88682924	88686713
chr1	88774230	88774940
chr1	88889848	88893898
chr1	88984219	88984517
chr1	88985377	88985687
chr1	88991037	88993862
chr1	89021842	89023558
chr1	89523719	89526224
chr1	89631920	89634747
chr1	89820343	89822726
chr1	89842840	89844826
chr1	89994460	89996993
chr1	90850960	90851661
chr1	90893688	90893983
chr1	91020349	91022779
chr1	91403908	91405086
chr1	91500398	91502817
chr1	91884469	91886635
chr1	92029243	92031241
chr1	92079824	92081446
chr1	92297665	92300524
chr1	92484314	92487363
chr1	92783702	92785741
chr1	92831432	92833955
chr1	92960242	92962877
chr1	93078349	93081495
chr1	93178840	93182057
chr1	93344360	93348667
chr1	93446835	93450137
chr1	93680309	93682450
chr1	93845570	93848653
chr1	93877937	93880228
chr1	93907731	93910298
chr1	94025441	94026011
chr1	94195512	94196124
chr1	94196533	94197085
chr1	94235209	94239788
chr1	94244633	94248598
chr1	94325472	94326158
chr1	94326422	94327826
chr1	94417308	94420104
chr1	94540262	94542847
chr1	94819293	94821442
chr1	94854656	94855040
chr1	94864241	94864734
chr1	94924894	94927924
chr1	95071678	95073864
chr1	95116395	95118803
chr1	95233657	95235186
chr1	96720958	96723405
chr1	97919748	97922052
chr1	98660523	98663495
chr1	99264315	99264954
chr1	99756568	99757204
chr1	99757830	99758773
chr1	99764668	99767180
chr1	99773704	99774437
chr1	99849211	99851737
chr1	99968908	99971796
chr1	100036742	100040095
chr1	100131118	100134994
chr1	100248320	100250656
chr1	100265029	100267631
chr1	100350909	100355288
chr1	100893568	100897536
chr1	101024448	101027230
chr1	101235334	101236712
chr1	103525125	103527307
chr1	107056254	107057946
chr1	108198559	108201432
chr1	108559622	108561836
chr1	108690624	108695126
chr1	108746343	108748096
chr1	108830277	108831007
chr1	108876527	108878570
chr1	108962016	108964229
chr1	109040250	109042706
chr1	109074717	109076922
chr1	109079401	109080255
chr1	109090147	109092467
chr1	109099707	109101967
chr1	109112596	109113075
chr1	109213271	109215582
chr1	109249259	109250488
chr1	109282079	109284133
chr1	109396862	109398649
chr1	109424595	109428086
chr1	109465956	109466958
chr1	109483402	109485506
chr1	109493781	109495298
chr1	109546229	109550338
chr1	109618926	109621820
chr1	109649461	109650054
chr1	109655292	109656515
chr1	109910053	109911864
chr1	109984425	109986605
chr1	110004210	110004545
chr1	110033901	110036112
chr1	110150182	110151343
chr1	110209995	110211660
chr1	110336443	110340997
chr1	110406035	110408978
chr1	110962919	110965401
chr1	111138893	111141868
chr1	111202386	111205132
chr1	111345983	111346840
chr1	111447619	111451028
chr1	111593080	111593517
chr1	111619075	111621503
chr1	111737922	111740545
chr1	111754499	111757526
chr1	111989505	111991539
chr1	112221250	112221873
chr1	112337196	112337534
chr1	112390508	112391620
chr1	112395102	112397637
chr1	112508010	112509053
chr1	112617780	112621553
chr1	112673553	112676309
chr1	112704312	112708121
chr1	112713760	112716482
chr1	112718620	112719076
chr1	112953873	112958263
chr1	113072337	113074561
chr1	113191058	113191943
chr1	113388787	113392669
chr1	113456747	113457577
chr1	113757671	113760066
chr1	113810477	113813324
chr1	113903608	113906602
chr1	113928399	113931879
chr1	114509273	114512650
chr1	114580303	114583139
chr1	114668786	114671535
chr1	114715261	114717255
chr1	114756025	114758609
chr1	114779219	114781315
chr1	115089121	115089731
chr1	115147577	115148305
chr1	115641641	115643879
chr1	115975400	115977814
chr1	116109759	116110189
chr1	116151929	116152625
chr1	116372485	116377195
chr1	116417366	116419597
chr1	116569449	116571684
chr1	116666759	116668341
chr1	116878526	116879088
chr1	116909181	116911625
chr1	117058068	117061466
chr1	117120817	117122276
chr1	117365648	117369285
chr1	117605214	117607062
chr1	117735214	117735624
chr1	117758576	117758955
chr1	117927849	117931905
chr1	119139433	119142008
chr1	119646764	119649356
chr1	119675070	119675739
chr1	119711589	119713494
chr1	120068092	120070637
chr1	120174804	120177006
chr1	120233004	120233394
chr1	120339631	120343375
chr1	120414472	120416700
chr1	120558153	120559769
chr1	120722966	120725712
chr1	120844343	120845132
chr1	120849861	120850854
chr1	120851203	120851984
chr1	120911744	120915401
chr1	120941717	120942589
chr1	120942837	120943170
chr1	121097290	121098335
chr1	121116729	121117233
chr1	121117716	121118597
chr1	121182706	121187063
chr1	121518610	121519813
chr1	143328333	143328582
chr1	143423950	143424643
chr1	143729929	143730411
chr1	143884538	143885794
chr1	143903662	143904676
chr1	143904962	143905973
chr1	143970187	143974742
chr1	144249570	144250256
chr1	144411762	144412259
chr1	144412895	144413364
chr1	144418483	144418802
chr1	144459972	144462298
chr1	144546429	144547420
chr1	144561170	144561814
chr1	144567412	144567972
chr1	144716120	144716887
chr1	145093252	145097588
chr1	145213452	145217373
chr1	145280150	145280902
chr1	145281313	145282199
chr1	145286761	145287904
chr1	145423849	145426274
chr1	145464348	145466181
chr1	145504876	145505846
chr1	145541155	145542183
chr1	145607452	145609624
chr1	145720980	145721238
chr1	145813073	145813607
chr1	145822579	145825429
chr1	145825899	145826340
chr1	145857887	145860350
chr1	145885673	145886141
chr1	145891380	145892287
chr1	145917384	145920069
chr1	145926129	145929139
chr1	145956618	145958697
chr1	145962065	145963031
chr1	145963247	145965713
chr1	146035816	146036142
chr1	146036879	146038004
chr1	146038327	146039325
chr1	146052243	146053641
chr1	146227271	146229910
chr1	146297441	146298643
chr1	146369461	146370215
chr1	146375704	146376569
chr1	146377055	146377343
chr1	146377683	146378312
chr1	146386571	146387658
chr1	146409692	146410033
chr1	146471936	146472635
chr1	146937936	146940256
chr1	147170769	147174108
chr1	147242130	147244809
chr1	147540513	147540905
chr1	147541000	147542240
chr1	147598960	147601653
chr1	147668858	147671360
chr1	147927829	147929828
chr1	148037647	148039039
chr1	148078105	148078998
chr1	148150286	148152566
chr1	148263007	148265377
chr1	148280281	148281269
chr1	148302552	148303691
chr1	148333486	148335643
chr1	148361731	148362826
chr1	148388290	148389293
chr1	148401879	148403664
chr1	148457377	148461230
chr1	148521609	148522354
chr1	148522634	148523691
chr1	148528142	148529224
chr1	148678052	148680760
chr1	148748227	148749620
chr1	148790459	148791322
chr1	148951685	148952783
chr1	149101636	149104238
chr1	149174472	149178382
chr1	149338921	149339657
chr1	149389621	149392577
chr1	149558668	149559486
chr1	149605742	149609761
chr1	149636146	149637163
chr1	149712173	149712493
chr1	149792655	149794064
chr1	149811285	149814177
chr1	149830806	149834194
chr1	149839800	149846015
chr1	149848046	149854649
chr1	149859486	149863066
chr1	149884824	149889209
chr1	149899351	149900946
chr1	149926351	149929107
chr1	149935935	149940050
chr1	150008762	150011571
chr1	150065368	150069201
chr1	150149855	150151015
chr1	150186342	150186830
chr1	150187048	150187413
chr1	150233687	150237012
chr1	150255857	150256312
chr1	150259649	150260607
chr1	150267626	150269693
chr1	150293055	150294939
chr1	150320988	150322796
chr1	150363249	150367022
chr1	150486707	150488732
chr1	150515242	150516847
chr1	150548581	150549715
chr1	150559916	150560519
chr1	150560867	150562656
chr1	150576800	150577152
chr1	150577483	150580666
chr1	150627669	150631079
chr1	150695775	150698072
chr1	150875202	150877593
chr1	150925575	150927629
chr1	150972555	150975918
chr1	150976082	150978318
chr1	150981069	150981933
chr1	150982188	150982517
chr1	151007943	151009865
chr1	151058045	151060707
chr1	151069975	151072580
chr1	151145988	151147450
chr1	151164816	151167594
chr1	151188441	151191296
chr1	151193716	151200990
chr1	151254334	151256311
chr1	151280769	151284105
chr1	151325890	151328880
chr1	151340860	151341174
chr1	151346201	151347951
chr1	151398324	151400985
chr1	151457043	151460233
chr1	151510586	151514395
chr1	151539471	151542035
chr1	151608276	151608762
chr1	151611284	151613754
chr1	151762246	151764847
chr1	151789889	151791920
chr1	151830895	151831786
chr1	151908251	151910656
chr1	151989783	151990237
chr1	151991215	151994961
chr1	152034305	152037351
chr1	152047079	152049019
chr1	152107260	152108148
chr1	152109483	152111002
chr1	153533064	153536946
chr1	153538078	153538774
chr1	153544324	153546593
chr1	153549004	153549243
chr1	153566066	153566545
chr1	153567543	153567991
chr1	153568235	153569253
chr1	153608133	153614689
chr1	153615279	153616683
chr1	153626394	153627804
chr1	153633539	153636119
chr1	153658173	153660034
chr1	153669404	153672449
chr1	153708111	153708938
chr1	153727372	153729413
chr1	153774830	153776627
chr1	153782970	153784160
chr1	153921295	153924611
chr1	153944644	153947071
chr1	153956930	153959171
chr1	153962079	153965282
chr1	153965953	153968909
chr1	153976084	153978765
chr1	153985064	153987394
chr1	153990047	153992408
chr1	154181446	154184050
chr1	154218542	154222732
chr1	154271923	154273765
chr1	154324524	154327325
chr1	154328029	154329520
chr1	154352476	154353366
chr1	154405045	154406708
chr1	154556850	154559908
chr1	154606580	154609826
chr1	154626182	154628789
chr1	154932153	154932587
chr1	154935697	154938063
chr1	154955411	154956629
chr1	154960429	154963256
chr1	154970401	154976838
chr1	154982257	154985170
chr1	154998813	155005289
chr1	155017100	155018074
chr1	155049978	155052966
chr1	155062613	155065010
chr1	155070820	155071313
chr1	155078623	155081457
chr1	155082762	155083488
chr1	155084051	155086635
chr1	155094309	155094746
chr1	155126947	155131042
chr1	155134464	155137592
chr1	155138613	155140979
chr1	155167358	155168087
chr1	155171954	155174578
chr1	155192526	155196265
chr1	155206994	155207333
chr1	155207875	155210674
chr1	155218600	155219020
chr1	155226027	155228125
chr1	155240560	155241721
chr1	155242937	155245271
chr1	155253915	155256107
chr1	155260929	155262689
chr1	155272154	155274666
chr1	155277050	155278783
chr1	155307590	155310383
chr1	155322487	155326179
chr1	155560859	155565255
chr1	155609007	155611615
chr1	155651085	155652026
chr1	155686717	155690790
chr1	155744898	155746999
chr1	155855943	155859470
chr1	155932399	155935556
chr1	155940197	155941628
chr1	155975875	155980401
chr1	156003413	156003863
chr1	156019675	156021393
chr1	156052450	156056044
chr1	156060011	156062810
chr1	156081945	156083984
chr1	156105757	156106939
chr1	156113813	156118905
chr1	156120948	156124342
chr1	156124852	156127563
chr1	156193104	156195143
chr1	156212475	156214805
chr1	156280872	156284433
chr1	156294966	156296047
chr1	156336120	156339770
chr1	156356798	156357441
chr1	156368675	156370053
chr1	156419529	156422324
chr1	156456467	156457890
chr1	156498805	156501865
chr1	156502794	156503640
chr1	156504609	156505358
chr1	156571181	156572878
chr1	156590737	156593030
chr1	156599782	156603071
chr1	156657672	156658170
chr1	156659428	156662306
chr1	156677367	156678384
chr1	156689187	156690126
chr1	156692488	156693380
chr1	156703627	156707210
chr1	156713076	156713383
chr1	156725567	156730005
chr1	156739647	156742165
chr1	156746425	156753561
chr1	156765639	156769672
chr1	156813187	156814363
chr1	156906942	156908910
chr1	157044615	157047174
chr1	157136294	157139557
chr1	157993083	157994928
chr1	158009736	158010170
chr1	158019502	158020110
chr1	158113205	158113941
chr1	158149213	158149687
chr1	159452995	159453322
chr1	159780642	159781961
chr1	159853698	159855503
chr1	159900298	159900530
chr1	159924000	159926004
chr1	159944663	159946601
chr1	160030242	160033674
chr1	160070108	160070650
chr1	160097331	160098782
chr1	160205036	160206726
chr1	160260362	160263262
chr1	160283384	160285481
chr1	160341552	160344784
chr1	160407923	160408619
chr1	161019733	161023021
chr1	161037324	161039575
chr1	161044399	161046975
chr1	161097862	161098616
chr1	161115187	161120080
chr1	161131192	161134508
chr1	161152893	161155326
chr1	161158625	161160537
chr1	161165454	161167906
chr1	161176393	161178262
chr1	161201616	161203818
chr1	161225696	161227748
chr1	161304089	161306800
chr1	161313910	161315743
chr1	161389148	161390889
chr1	161398589	161400563
chr1	161440070	161440945
chr1	161523986	161524403
chr1	161530470	161531823
chr1	161539473	161540159
chr1	161611050	161613397
chr1	161621037	161621926
chr1	161725860	161728097
chr1	161749314	161751595
chr1	161763745	161763988
chr1	161764357	161767800
chr1	162023454	162024882
chr1	162065287	162066165
chr1	162069054	162071298
chr1	162144618	162145741
chr1	162497329	162499464
chr1	162560626	162563043
chr1	162790232	162791892
chr1	162822157	162823114
chr1	163069258	163069986
chr1	163320347	163323547
chr1	163645592	163646808
chr1	164558055	164560410
chr1	165376282	165376682
chr1	165597435	165598951
chr1	165629759	165633180
chr1	165696556	165699287
chr1	165767757	165770660
chr1	165826958	165829990
chr1	166166568	166167678
chr1	166489509	166490543
chr1	166838216	166840760
chr1	166874767	166877114
chr1	166974752	166976201
chr1	167059090	167059595
chr1	167120726	167121867
chr1	167218969	167222975
chr1	167454389	167455847
chr1	167552478	167554277
chr1	167714178	167716976
chr1	167720912	167723618
chr1	167934363	167938775
chr1	168135260	168137955
chr1	168178522	168180828
chr1	168225346	168227616
chr1	168347831	168348926
chr1	169105396	169110470
chr1	169112868	169114284
chr1	169366857	169369695
chr1	169484257	169486760
chr1	169711620	169712183
chr1	169793715	169796360
chr1	169890974	169895161
chr1	170073519	170075326
chr1	170530515	170533824
chr1	171250902	171251928
chr1	171313956	171314818
chr1	171373162	171374012
chr1	171484347	171487743
chr1	171740600	171743647
chr1	171780691	171782915
chr1	171840657	171841957
chr1	172442754	172444408
chr1	172531563	172534902
chr1	172932123	172934314
chr1	173476191	173479236
chr1	173714042	173716696
chr1	173822878	173825808
chr1	173864794	173865041
chr1	173865646	173869867
chr1	174020804	174023756
chr1	174158449	174161018
chr1	174204826	174205980
chr1	174238828	174239971
chr1	174848793	174849836
chr1	174990608	174990961
chr1	174998184	175001878
chr1	175021927	175024262
chr1	175191340	175193822
chr1	176205263	176208781
chr1	177406562	177407107
chr1	178037447	178038290
chr1	178092686	178095759
chr1	178542381	178543562
chr1	178724439	178727002
chr1	179017509	179018017
chr1	179024969	179027950
chr1	179081186	179083547
chr1	179129208	179129680
chr1	179134437	179134688
chr1	179228316	179230744
chr1	179293429	179295455
chr1	179365254	179366791
chr1	179814696	179815850
chr1	179875905	179878525
chr1	179881169	179884544
chr1	179954078	179956535
chr1	180153387	180156461
chr1	180230005	180232053
chr1	180500933	180503697
chr1	180631659	180633906
chr1	181021144	181023530
chr1	181033442	181034763
chr1	181087495	181090699
chr1	181101663	181101952
chr1	181104050	181105362
chr1	181105651	181105963
chr1	182028721	182030762
chr1	182060942	182061962
chr1	182389999	182393083
chr1	182588067	182589526
chr1	182603235	182604743
chr1	182838760	182842221
chr1	183021826	183025184
chr1	183185684	183187420
chr1	183234684	183235147
chr1	183469858	183474231
chr1	183493438	183494205
chr1	183633690	183636855
chr1	183657778	183658535
chr1	183804710	183806106
chr1	184050771	184053369
chr1	184385832	184388546
chr1	184753353	184756104
chr1	184973551	184974741
chr1	185001167	185001994
chr1	185045068	185047614
chr1	185155057	185158506
chr1	185257142	185258552
chr1	185315144	185318503
chr1	185733577	185735056
chr1	186373591	186377633
chr1	186637181	186637782
chr1	186679652	186681421
chr1	186828372	186830098
chr1	189658015	189658337
chr1	190477332	190479727
chr1	192808324	192810351
chr1	192978873	192980911
chr1	193057194	193061479
chr1	193103665	193106114
chr1	193121444	193124230
chr1	197145022	197147335
chr1	197200140	197202779
chr1	197773753	197776101
chr1	197901652	197903738
chr1	198155954	198160250
chr1	198234200	198235147
chr1	198929618	198930921
chr1	198932424	198932947
chr1	198934572	198937813
chr1	199734540	199734809
chr1	200028454	200029450
chr1	200038915	200040384
chr1	200302037	200303482
chr1	200408831	200411205
chr1	200415634	200416413
chr1	200619692	200622438
chr1	200668422	200671444
chr1	200738475	200740925
chr1	200890635	200893195
chr1	200894478	200896034
chr1	200896527	200896877
chr1	201022847	201023791
chr1	201114092	201115516
chr1	201153096	201154868
chr1	201170583	201171881
chr1	201259591	201260733
chr1	201396946	201400635
chr1	201461184	201462194
chr1	201467228	201469686
chr1	201480443	201481223
chr1	201505838	201508102
chr1	201538622	201539690
chr1	201648164	201650908
chr1	201714303	201715166
chr1	201738534	201741395
chr1	201828990	201830794
chr1	201888224	201889578
chr1	201954236	201957074
chr1	201981986	201984647
chr1	202007076	202011788
chr1	202018016	202018996
chr1	202034582	202035132
chr1	202056965	202057397
chr1	202105766	202106212
chr1	202107712	202108452
chr1	202142944	202145684
chr1	202236078	202236403
chr1	202340148	202342834
chr1	202348262	202350083
chr1	202380156	202380613
chr1	202802846	202804060
chr1	202806526	202808981
chr1	202810215	202811567
chr1	202860507	202862454
chr1	202887467	202889623
chr1	202925604	202927882
chr1	202956561	202959642
chr1	202966318	202968001
chr1	203006041	203008695
chr1	203026327	203027082
chr1	203127412	203128668
chr1	203267484	203268243
chr1	203304890	203307040
chr1	203326861	203328286
chr1	203626064	203627577
chr1	203682256	203684056
chr1	203795130	203797293
chr1	203861047	203863111
chr1	203889500	203890135
chr1	204072853	204075406
chr1	204080070	204080480
chr1	204151005	204153152
chr1	204213112	204214333
chr1	204288062	204288342
chr1	204313740	204314238
chr1	204377066	204378812
chr1	204408860	204412800
chr1	204417271	204418083
chr1	204493571	204495595
chr1	204506166	204506436
chr1	204506723	204506988
chr1	204515361	204517970
chr1	204684566	204686025
chr1	205120444	205123342
chr1	205210084	205212039
chr1	205227167	205229523
chr1	205320448	205321949
chr1	205441449	205441944
chr1	205447724	205450727
chr1	205456770	205457688
chr1	205504092	205506066
chr1	205592071	205592585
chr1	205629819	205633045
chr1	205664562	205665133
chr1	205678845	205680991
chr1	205748055	205751401
chr1	205774477	205775839
chr1	205811601	205814382
chr1	206201309	206205658
chr1	206288057	206288545
chr1	206469768	206471581
chr1	206507336	206508490
chr1	206556409	206557885
chr1	206610998	206613106
chr1	206635114	206636753
chr1	206684247	206687170
chr1	206909015	206909939
chr1	207049480	207054372
chr1	207153016	207154652
chr1	207320938	207323418
chr1	207453764	207455169
chr1	207750417	207753790
chr1	207867804	207869624
chr1	207963781	207964041
chr1	208243035	208245393
chr1	209651212	209653105
chr1	209783435	209785165
chr1	209805007	209807413
chr1	209822883	209823544
chr1	209826769	209829574
chr1	210232619	210234299
chr1	210251163	210251565
chr1	210328113	210330209
chr1	211257365	211261586
chr1	211326249	211327756
chr1	211382081	211384233
chr1	211416369	211416706
chr1	211515166	211515554
chr1	211577013	211580338
chr1	211674255	211676844
chr1	211829304	211831355
chr1	212034064	212037670
chr1	212283795	212288017
chr1	212289959	212291630
chr1	212413491	212415219
chr1	212432290	212434730
chr1	212566653	212567509
chr1	212596069	212596401
chr1	212607726	212610346
chr1	212698776	212699993
chr1	212789647	212793209
chr1	212856893	212859671
chr1	212950235	212951291
chr1	213013816	213017529
chr1	213050443	213052593
chr1	213123860	213124312
chr1	214280004	214282932
chr1	214439346	214440004
chr1	214446716	214447020
chr1	214447261	214447637
chr1	214549719	214552751
chr1	214602547	214605177
chr1	215566382	215570239
chr1	217629232	217632183
chr1	217964940	217965568
chr1	218285068	218286903
chr1	218345901	218346366
chr1	218674190	218674613
chr1	219173354	219175685
chr1	220044628	220047132
chr1	220088464	220090892
chr1	220093726	220095602
chr1	220270922	220273152
chr1	220527072	220530106
chr1	220690002	220691821
chr1	220732947	220733667
chr1	220734655	220734969
chr1	220747448	220749739
chr1	220786547	220788153
chr1	220879151	220880734
chr1	221741228	221744006
chr1	222465166	222465889
chr1	222588307	222591051
chr1	222618083	222619777
chr1	222642977	222645368
chr1	222710422	222714639
chr1	222814391	222816721
chr1	223123500	223123822
chr1	223133975	223134324
chr1	223142710	223143699
chr1	223701078	223701521
chr1	223706949	223708204
chr1	223711580	223715665
chr1	223772059	223772494
chr1	223843915	223847122
chr1	223991341	223994409
chr1	224113489	224116620
chr1	224182187	224184767
chr1	224328527	224331491
chr1	224356718	224358354
chr1	224432227	224436625
chr1	224928487	224931284
chr1	225425471	225429296
chr1	225651168	225654052
chr1	225656002	225656350
chr1	225700013	225700484
chr1	225777172	225779855
chr1	225809613	225811145
chr1	225875177	225875872
chr1	225881104	225884503
chr1	225922733	225925237
chr1	225998089	225999978
chr1	226061139	226065232
chr1	226082919	226084521
chr1	226109645	226110368
chr1	226121444	226123494
chr1	226127505	226128881
chr1	226184940	226187772
chr1	226307697	226310412
chr1	226333130	226333509
chr1	226406204	226408662
chr1	226738356	226739880
chr1	226869980	226872019
chr1	226939025	226941384
chr1	227315267	227319453
chr1	227563280	227564856
chr1	227728142	227729376
chr1	227734040	227737212
chr1	227787797	227789215
chr1	227945972	227949309
chr1	228080946	228084973
chr1	228101341	228104157
chr1	228108022	228110587
chr1	228130801	228131843
chr1	228138736	228141785
chr1	228164703	228167106
chr1	228174578	228175070
chr1	228213207	228214029
chr1	228269610	228270025
chr1	228275272	228276068
chr1	228377773	228379009
chr1	228405061	228408215
chr1	228455923	228460009
chr1	228463671	228464018
chr1	228484945	228489180
chr1	228646701	228649319
chr1	228663241	228663923
chr1	228664165	228664497
chr1	228734739	228736816
chr1	229270978	229272809
chr1	229340911	229343600
chr1	229506753	229509481
chr1	229556818	229560060
chr1	229624455	229628095
chr1	230066462	230069277
chr1	230642144	230644222
chr1	230867002	230869270
chr1	230977340	230980392
chr1	231038537	231040517
chr1	231211287	231211905
chr1	231239583	231243012
chr1	231336315	231339861
chr1	231419886	231423923
chr1	231527365	231530312
chr1	231603430	231604223
chr1	231626135	231627805
chr1	232628880	232631169
chr1	232949565	232952084
chr1	232952701	232953076
chr1	233112884	233114110
chr1	233294133	233296511
chr1	233326662	233330087
chr1	233356165	233356414
chr1	233518560	233518838
chr1	233612908	233616254
chr1	233904136	233905986
chr1	234356069	234358043
chr1	234371723	234374929
chr1	234477423	234479414
chr1	234599342	234600088
chr1	234607769	234611859
chr1	234612311	234613140
chr1	234997785	234998431
chr1	235126850	235129209
chr1	235159949	235162409
chr1	235325737	235331146
chr1	235366650	235368973
chr1	235502580	235506691
chr1	235641955	235642891
chr1	235649137	235650039
chr1	235865561	235868205
chr1	235902504	235902992
chr1	236106209	236106786
chr1	236141235	236143869
chr1	236280641	236282869
chr1	236503105	236503714
chr1	236523055	236525868
chr1	236602899	236605468
chr1	236794662	236797180
chr1	241517976	241520901
chr1	241531211	241532523
chr1	241638811	241640697
chr1	241822880	241824410
chr1	241847188	241849753
chr1	241944337	241945675
chr1	243100617	243101734
chr1	243253126	243257534
chr1	243266094	243269803
chr1	243487545	243489075
chr1	243850359	243850639
chr1	244047328	244049193
chr1	244299677	244299986
chr1	244322782	244323287
chr1	244450352	244452997
chr1	244652137	244655000
chr1	244801244	244801522
chr1	244833070	244837976
chr1	244861570	244865682
chr1	244918582	244919188
chr1	244969080	244972472
chr1	245153204	245155119
chr1	245156166	245157026
chr1	246506042	246507927
chr1	246564781	246568303
chr1	246929830	246932909
chr1	247006593	247008637
chr1	247077198	247079255
chr1	247102878	247105030
chr1	247126252	247127767
chr1	247170898	247172545
chr1	247209416	247211701
chr1	247330132	247333569
chr1	247447903	247448267
chr1	248824851	248827177
chr1	248837021	248840123
chr1	248857231	248860432
chr1	248862927	248863317
chr1	248872565	248874104
chr1	248905179	248907705
chr10	35367	35926
chr10	75849	76749
chr10	133542	137527
chr10	329294	330227
chr10	415074	416300
chr10	683040	684220
chr10	688203	690591
chr10	784606	784904
chr10	929361	933425
chr10	986751	990215
chr10	1047694	1051103
chr10	1054787	1058263
chr10	2985044	2986623
chr10	3066891	3070092
chr10	3090808	3091611
chr10	3094999	3095722
chr10	3171255	3173313
chr10	3287189	3288063
chr10	3424135	3424977
chr10	3467129	3468735
chr10	3762279	3763715
chr10	3782880	3786873
chr10	3809913	3810681
chr10	3811094	3811528
chr10	3828470	3829658
chr10	4671183	4672437
chr10	4826039	4827244
chr10	5094354	5094898
chr10	5411983	5414404
chr10	5446671	5447222
chr10	5547150	5548282
chr10	5665363	5667256
chr10	5684229	5687008
chr10	5811177	5815098
chr10	5888255	5891546
chr10	5976033	5978993
chr10	6088638	6091025
chr10	6144204	6146581
chr10	6163246	6165733
chr10	6202538	6204799
chr10	6274817	6276026
chr10	6401384	6401931
chr10	6579501	6581349
chr10	6737275	6737740
chr10	7786316	7789995
chr10	7817094	7820429
chr10	8053569	8054551
chr10	11609424	11612362
chr10	11684704	11686125
chr10	11742386	11743597
chr10	11819577	11820430
chr10	11822983	11824823
chr10	12041110	12043963
chr10	12068605	12070330
chr10	12128105	12128408
chr10	12128733	12130806
chr10	12194089	12198386
chr10	12333482	12333852
chr10	12348816	12351098
chr10	12981930	12982208
chr10	13000738	13002207
chr10	13098991	13101453
chr10	13160704	13162890
chr10	13299134	13301047
chr10	13301654	13302860
chr10	13345931	13350351
chr10	13382714	13383730
chr10	13527340	13529800
chr10	13586441	13588296
chr10	14602032	14605046
chr10	14836894	14840317
chr10	14877069	14880871
chr10	14952933	14955008
chr10	14958797	14961225
chr10	14975789	14976138
chr10	15084198	15085204
chr10	15088081	15088973
chr10	15096423	15099466
chr10	15167106	15168745
chr10	15369575	15372073
chr10	15858731	15861748
chr10	16436407	16438306
chr10	16816327	16818380
chr10	17029345	17029943
chr10	17200089	17202099
chr10	17228253	17228765
chr10	17230111	17231456
chr10	17348528	17348803
chr10	17452566	17455384
chr10	17616243	17618379
chr10	17642180	17646702
chr10	17650049	17651517
chr10	17655012	17655259
chr10	17655641	17657480
chr10	18140094	18141094
chr10	18650027	18652552
chr10	18657935	18661640
chr10	21172506	21175857
chr10	21363949	21364266
chr10	21495626	21498097
chr10	21516240	21520443
chr10	21525362	21536381
chr10	22001809	22004007
chr10	22042562	22044005
chr10	22086871	22087241
chr10	22228755	22231021
chr10	22251238	22254262
chr10	22277521	22278806
chr10	22315279	22317894
chr10	22319924	22323380
chr10	22324670	22326892
chr10	22339849	22341778
chr10	22427361	22428889
chr10	22436648	22438679
chr10	22615531	22616529
chr10	22617644	22618722
chr10	22712199	22715233
chr10	22816525	22816899
chr10	22823257	22824057
chr10	22824381	22825080
chr10	22825550	22825904
chr10	22927783	22928514
chr10	23095451	23097164
chr10	23438406	23441004
chr10	24466199	24467665
chr10	24722190	24725577
chr10	25015468	25017894
chr10	25174710	25175047
chr10	25465416	25467161
chr10	26696339	26699430
chr10	26859075	26861205
chr10	26881708	26882445
chr10	27098953	27100858
chr10	27152259	27157346
chr10	27239296	27244458
chr10	27252478	27253488
chr10	27503560	27506247
chr10	27741895	27745033
chr10	27997262	27999328
chr10	28178158	28179098
chr10	28180982	28181438
chr10	28300980	28304244
chr10	28502248	28503500
chr10	28531179	28535259
chr10	28676550	28679406
chr10	29409165	29410972
chr10	29437688	29439110
chr10	29634107	29635552
chr10	29734415	29737151
chr10	30057125	30059996
chr10	30347215	30349620
chr10	30432670	30435857
chr10	30583303	30584226
chr10	31031016	31032895
chr10	31317523	31321291
chr10	31602961	31604070
chr10	31758973	31760726
chr10	31912906	31914228
chr10	31925872	31931778
chr10	31936935	31937290
chr10	31939556	31940847
chr10	32053860	32057290
chr10	32344891	32348183
chr10	32376780	32379795
chr10	32444997	32447770
chr10	32955456	32959945
chr10	32961710	32962574
chr10	32980049	32982761
chr10	32982894	32983279
chr10	33005029	33006320
chr10	33010036	33010411
chr10	33333674	33336182
chr10	34426413	34427374
chr10	34556152	34556851
chr10	34813426	34816022
chr10	35041080	35041511
chr10	35088735	35091316
chr10	35125765	35129216
chr10	35195221	35196649
chr10	35334707	35338611
chr10	35642010	35642653
chr10	35643184	35643511
chr10	37856215	37858726
chr10	37975429	37977173
chr10	38009756	38012221
chr10	38094005	38095684
chr10	38355799	38357526
chr10	38401522	38404146
chr10	42474024	42477217
chr10	42551650	42553268
chr10	42637112	42639620
chr10	42664748	42665702
chr10	42753219	42756012
chr10	42781744	42784299
chr10	43076315	43078083
chr10	43136813	43139984
chr10	43201816	43204224
chr10	43228848	43230200
chr10	43304414	43305736
chr10	43355815	43356308
chr10	43361171	43363005
chr10	43395358	43400344
chr10	43403439	43411108
chr10	43420465	43421884
chr10	43435556	43438072
chr10	43453806	43456464
chr10	43573751	43574709
chr10	43606339	43607497
chr10	43647910	43649358
chr10	44958367	44960316
chr10	44974462	44975391
[truncated: 15,642 more rows]
